# 1 Formation of the substantia nigra 2 requires Reelin-mediated fast, 3 laterally-directed migration of 4 dopaminergic neurons

5 **Ankita Ravi Vaswani<sup>1</sup>, Beatrice Weykopf<sup>2</sup>, Cathleen Hagemann<sup>1</sup>, Hans-Ulrich  
6 Fried<sup>3</sup>, Oliver Brüstle<sup>2</sup>, Sandra Blaess<sup>1</sup>**

\*For correspondence:

7 <sup>1</sup>Neurodevelopmental Genetics, Institute of Reconstructive Neurobiology,  
8 Sigmund-Freud-Str. 25, Bonn, 53127, Germany; <sup>2</sup>Institute of Reconstructive Neurobiology,  
9 Sigmund-Freud-Str. 25, Bonn, 53127, Germany; <sup>3</sup>Light Microscope Facility, German  
10 Center for Neurodegenerative Diseases (DZNE), Sigmund-Freud-Str. 27, Bonn, 53127,  
11 Germany

12 

---

  
13 **Abstract** Midbrain dopaminergic (mDA) neurons migrate to form the laterally-located substantia  
14 nigra pars compacta (SN) and medially-located ventral tegmental area (VTA), but little is known  
15 about the underlying cellular and molecular processes. Reelin signaling regulates tangential  
16 migration of SN-mDA neurons, but whether Reelin acts directly on SN-mDA neurons and how it  
17 affects their cellular morphology and migratory behavior has not been explored. Here we visualize  
18 the dynamic cell morphologies of tangentially migrating SN-mDA neurons with 3D-time-lapse  
19 imaging and identify two distinct migration modes. Slow migration is the default mode in SN-mDA  
20 neurons, while fast, laterally-directed migration occurs infrequently and is strongly associated with  
21 bipolar cell morphology. By specifically inactivating Reelin signaling in mDA neurons we  
22 demonstrate its direct role in SN-mDA tangential migration. We show that Reelin signaling  
23 promotes laterally-biased movements in mDA neurons during their slow migration mode, stabilizes  
24 leading process morphology and increases the probability of fast, laterally-directed migration.

## 25 --- 26 Introduction

27 Dopaminergic neurons in the ventral midbrain (mDA neurons) are the major source of dopamine in  
28 the mammalian brain. Dysfunction in the dopaminergic system is associated with schizophrenia,  
29 addiction and depression, and degeneration of mDA neurons in the substantia nigra pars com-  
30 pacta (SN) results in the motor symptoms of Parkinson's disease *Grace and Bunney (1980), Volkow*  
31 *and Morales (2015), Przedborski (2017)*. mDA neurons originate in the floor plate of the ventral  
32 mesencephalon, from where they migrate to cluster into the laterally-positioned SN, the medially-  
33 located ventral tegmental area (VTA) and the posterior retrorubral field. SN-mDA neurons project  
34 predominantly to the dorsal striatum and modulate voluntary movement *Weisenhorn et al. (2016)*,  
35 while VTA-mDA neurons project to various forebrain targets, including the prefrontal cortex, nucleus  
36 accumbens and basolateral amygdala, and are important for the regulation of cognitive function  
37 and reward behavior *Morales and Margolis (2017)*. How this anatomy is set up during development  
38 remains unclear.

39 mDA neurons differentiation starts at embryonic day (E) 10.5 in the mouse, when the first mDA

40 neurons that express tyrosine hydroxylase (TH), the rate limiting enzyme in dopamine synthesis  
41 and a marker for differentiated mDA neurons, leave the ventricular zone of the ventral midbrain.  
42 Differentiated mDA neurons undergo a maturation process as they migrate to reach their final  
43 positions **Blaess and Ang (2015)**. We have previously shown that both SN- and VTA-mDA neurons  
44 undergo radial migration into the mantle layer of the developing ventral midbrain where they  
45 remain intermingled until E13.5. Between E13.5 and E15.5, mDA neurons destined for the SN  
46 migrate tangentially to more lateral positions, resulting in the segregation of mDA neurons into  
47 the laterally-located SN and the medially-situated VTA **Bodea et al. (2014)**. This particular migration  
48 pattern suggests that SN-mDA neurons have the specific molecular machinery to respond to cues  
49 in their environment that direct their lateral migration. As exemplified by migration studies in  
50 cortical brain areas, a comprehensive characterization of migratory modes and accompanying  
51 changes in cell morphology is indispensable for unraveling the molecular mechanisms by which  
52 cell-type specific migratory behavior is regulated **Kriegstein and Noctor (2004)**. So far, a detailed  
53 understanding of mDA neuronal migratory behavior has remained elusive due to challenges in  
54 visualizing migrating mDA neurons in sufficient detail.

55 At the molecular level, Reelin, an extracellular matrix molecule and known regulator of neuronal  
56 migration in various brain areas, is essential for the correct lateral localization of SN-mDA neurons.  
57 Reelin binds to its receptors APOER2 and VLDLR, and induces the phosphorylation of the intracellular  
58 transducer DAB1 **Hiesberger et al. (1999)**, **Trommsdorff et al. (1999)**. Phosphorylated DAB1 then  
59 mediates Reelin signaling by regulating cell adhesive properties or cytoskeletal stability **Chai et al.**  
60 **(2016)**, **Franco et al. (2011)**, **Howell et al. (1997)**. In mice homozygous for null alleles of *Reelin*  
61 (*reeler*) or *Dab1* (*scrambler* or *Dab1null*), in *Vldlr/Apoer2* double knockout mice, or in organotypic  
62 slices in which Reelin signaling is blocked, SN-mDA neurons do not reach their final positions  
63 in the ventrolateral midbrain and accumulate instead in the area of the lateral VTA **Bodea et al.**  
64 **(2014)**, **Vaswani and Blaess (2016)** **Kang et al. (2010)**; **Nishikawa et al. (2003)**; **Sharaf et al. (2013)**.  
65 Whether Reelin affects tangential (lateral) mDA neuronal migration directly, or whether the failure of  
66 SN-mDA neurons to reach their final position in Reelin pathway mutants is due to alterations in glia  
67 fibers or neighboring neuronal populations has not been explored. Moreover, it is not understood  
68 how the loss of Reelin signaling alters dynamic migration processes of mDA neurons and which of  
69 the multiple signaling events downstream of Reelin plays a role in mDA neuronal migration.

70 Here, we dissect the complex dynamic morphological changes that underlie the tangential  
71 migration of SN-mDA neurons using 2-photon excitation time-lapse imaging and a semi-automated  
72 data analysis pipeline. We find that mDA neurons migrate in two modes: infrequent laterally-  
73 directed fast migration and frequent slow movement. We demonstrate that migrating mDA neurons  
74 undergo dynamic changes in cell morphology and show that fast, directed migratory spurts are  
75 strongly associated with bipolar morphology. Combining conditional gene inactivation, genetic fate  
76 mapping and time-lapse imaging, we demonstrate that Reelin affects mDA neuronal migration in a  
77 direct manner and promotes fast, laterally-directed migration of mDA neurons and stabilizes their  
78 leading process morphology.

## 79 Results

### 80 Reelin signaling acts directly on tangentially migrating mDA neurons

81 As a first step to understand the regulation of mDA tangential migration by Reelin, we investi-  
82 gated whether Reelin signaling is directly required by mDA neurons for their correct lateral localiza-  
83 tion. We conditionally inactivated *Dab1* in differentiated mDA neurons using a Cre-line in which Cre  
84 is knocked into the endogenous *dopamine transporter (Dat)* locus (genotype: *Dat<sup>Cre/+</sup>, Dab1<sup>del/flox</sup>*;  
85 referred to as *Dab1* CKO) **Ekstrand et al. (2007)**, **Franco et al. (2011)** (Figure 1A). To determine the  
86 onset of Cre-mediated recombination in the *DAT<sup>Cre/+</sup>* mouse line, we crossed *DAT<sup>Cre/+</sup>* mice with an en-  
87 hanced yellow fluorescent protein (YFP)-expressing reporter mouse line (*Rosa26<sup>lox-stop-lox-EYFP</sup>*) **Srini-**  
88 **vas et al. (2001)**. We observed widespread YFP-expression in TH-positive (TH<sup>+</sup>) cells in the lateral  
89 mDA neuron domain starting at E13.5 (Figure 1- Figure supplement 1). Immunostaining for DAB1

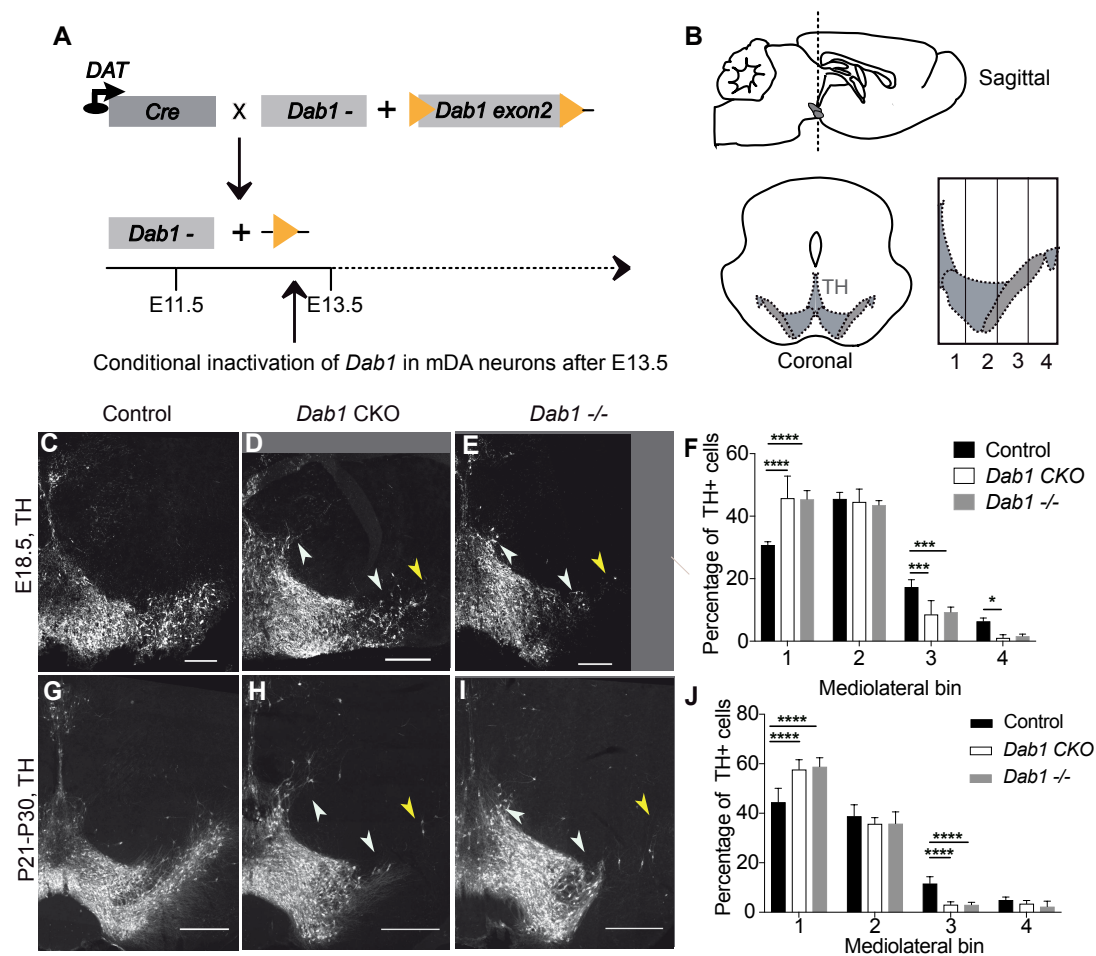

**Figure 1. Direct role of Reelin signaling in tangential migration of mDA neurons.** (A): Schematic showing Cre-mediated inactivation of *Dab1* in mDA neurons. (B) Schematic representing the anteroposterior level of coronal sections used for the analysis, and the mediolateral grid used to quantify distribution of TH<sup>+</sup> (Tyrosine Hydroxylase) neurons. (C-I) Immunostaining for TH and quantification of cell distribution for control, *Dab1* CKO, and *Dab1*<sup>-/-</sup> midbrain regions at E18.5 (C-F) and at P21-P30 (G-J). White arrowheads indicate differences in the mediolateral distribution of TH<sup>+</sup> cells. Yellow arrowheads point to cells in the substantia nigra pars lateralis used as a landmark for the most lateral position in the mediolateral grids. (F, J) Quantification of mediolateral distribution of TH<sup>+</sup> cells for control, *Dab1* CKO and *Dab1*<sup>-/-</sup> brains at E18.5 (F, n=4 for each genotype) and at P21-P30 (J, n=6 for each genotype). Data are represented as mean + s.e.m. \*\*\*\* indicates significant difference  $p < 0.0001$  as assessed by two-way ANOVA with Tukey's multiple comparison correction. Scale bars: (A-C) 100  $\mu$ m, (E-G) 200  $\mu$ m. **Figure 1- Figure supplement 1.** *Dat*<sup>Cre</sup> mediated recombination pattern. **Figure 1- Figure supplement 2.** Specific loss of DAB1 protein in mDA neurons of *Dab1* CKO brains. **Figure 1- Figure supplement 3.** Mediolateral distribution of mDA neurons at E15.5 in absence of Reelin signaling.

90 at E15.5 showed that DAB1 was no longer expressed in the lateral TH<sup>+</sup> domain in *Dab1* CKO mice,  
 91 while it was still present in a non-dopaminergic area lateral to the SN (Figure 1- Figure supplement  
 92 2). Since the inactivation of *Dab1* in *Dab1* CKO mice occurs after radial migration of SN-mDA neurons  
 93 is essentially completed *Bodea et al. (2014)*, any defects observed in SN formation in this mouse  
 94 model can be attributed to a misregulation of mDA tangential migration. Thus, the *Dab1* CKO model  
 95 allows us to specifically dissect out the direct role of Reelin signaling in the tangential migration of  
 96 mDA neurons.

97 SN-mDA neurons fail to migrate to their correct lateral position in *reeler*, *Dab1* null or *Apoer2/Vldlr*  
 98 double knock-out mutants *Bodea et al. (2014)*, *Howell et al. (1997)*, *Nishikawa et al. (2003)*. To  
 99 examine whether this phenotype is recapitulated in *Dab1* CKO mice, we compared the mediolateral

100 distribution of TH<sup>+</sup> mDA neurons in coronal midbrain sections of control, *Dab1* CKO and *Dab1*<sup>-/-</sup>  
 101 (genotype: *Dab1*<sup>del/del</sup>) mice at postnatal day (P)21-P30 and embryonic time points (E15.5 and  
 102 E18.5)(Figure 1; Figure 1- Figure supplement 3). We focused our analysis on intermediate rostrocau-  
 103 dal sections of the TH<sup>+</sup> mDA domain where the most severe defects in mediolateral distribution of  
 104 mDA neurons are observed in *reeler* and *Dab1*<sup>-/-</sup> mice *Bodea et al. (2014)* (Figure 1B). In both the  
 105 *Dab1* CKO and *Dab1*<sup>-/-</sup> mice, mDA neurons failed to reach lateral positions in the SN and settled  
 106 in more medial locations (Figure 1C-J; (Figure 1- Figure supplement 3). In addition, a few mDA  
 107 neurons were aberrantly located dorsal to the VTA (Figure 1C-E, G-I). As the shift in the mediolateral  
 108 distribution of mDA neurons observed in *Dab1* CKO and *Dab1*<sup>-/-</sup> brains was similar, we conclude  
 109 that Reelin acts directly on SN-mDA neurons to regulate their lateral migration.

110 We then asked whether such a direct function of Reelin is consistent with the localization of  
 111 Reelin protein. During the time window of SN-mDA tangential migration (before E15.5), *Reelin*  
 112 mRNA is expressed in the red nucleus, which is located dorsomedial to SN-mDA neurons. Whether  
 113 Reelin protein is localized close to migrating SN-mDA neurons during this period has not been  
 114 investigated *Bodea et al. (2014)*, *Nishikawa et al. (2003)*, *Sharaf et al. (2015)*. Immunostaining for  
 115 Reelin at E13.5 and E14.5 confirmed strong expression of the protein in the region of the red nucleus  
 116 (Figure 2B,C,E,F). At E13.5 and E14.5, Reelin protein, but not *Reelin* mRNA, was also observed ventral  
 117 and lateral to the red nucleus, including the area where the most lateral mDA neurons are localized  
 118 at these stages (Figure 2A-G). Thus, the localization of Reelin protein at E13.5-E14.5 is consistent  
 119 with a direct role of Reelin signaling in SN-mDA neuronal migration.

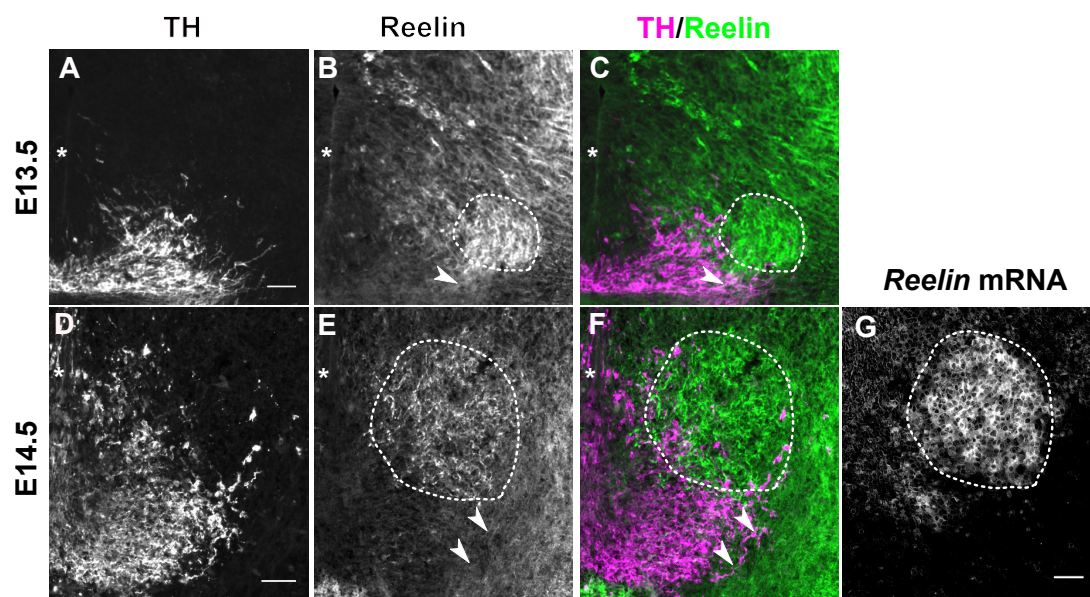

**Figure 2. Reelin protein in the ventral midbrain at E13.5 and 14.5.** (A-C) Double immunolabeling for TH and Reelin shows Reelin protein in the region of the red nucleus (RN, white dashed outline) and in the lateral TH<sup>+</sup> mDA domain (white arrowhead) at E13.5. (D-G) Double immunolabeling for TH and Reelin (D-F) and RNA in situ hybridization for *Reelin* mRNA (G) at E14.5. *Reelin* mRNA and Reelin protein are strongly expressed in the RN. Reelin protein is also localized ventral and lateral to the RN, overlapping with the lateral mDA domain (white arrowheads). Note that the colors in G were inverted. Asterisks indicate ventral midline. Scale bar: 50 μm.

### 120 **Reelin signaling contributes to the segregation of SN- and VTA-mDA neurons into separate clusters**

121  
 122 Given that SN-mDA neurons fail to form the lateral SN in the absence of Reelin signaling, we  
 123 asked whether Reelin signaling is important for the segregation of SN- and VTA-mDA neurons into  
 124 separate clusters. We have previously shown that mDA neurons positive for the potassium channel  
 125 GIRK2 (G-protein-regulated inward-rectifier potassium channel 2; expressed in mDA neurons in  
 126 the SN and lateral VTA) are shifted medially in *Dab1*<sup>-/-</sup> mice, while mDA neurons positive for

127 Calbindin (expressed in VTA-mDA neurons and in a dorsal subset of SN-mDA neurons) are correctly  
128 localized *Bodea et al. (2014)*, *Björklund and Dunnett (2007)*. Comparison of the mediolateral  
129 position of TH<sup>+</sup>, Calbindin<sup>+</sup> and TH<sup>+</sup>, GIRK2<sup>+</sup> cells in control and *Dab1* CKO brains at P30 showed  
130 that there was no significant difference in the distribution of TH<sup>+</sup>, Calbindin<sup>+</sup> mDA neurons between  
131 *Dab1* CKO mice and controls (data not shown). In contrast, the TH<sup>+</sup>, GIRK2<sup>+</sup> mDA subpopulation  
132 showed a significant shift to a more medial position in the *Dab1* CKO mice (Figure 3A-C). These  
133 results further confirmed that the *Dab1* CKO phenotype recapitulates the phenotype observed in  
134 *Dab1*<sup>-/-</sup> mice.

135 To investigate the distribution of medially shifted SN-mDA neurons within the VTA we analyzed  
136 the expression of the transcription factor SOX6 (sex determining region Y-box6), and the Lim domain  
137 protein LMO3 (LIM domain only protein 3) as markers for SN-mDA neurons and the expression  
138 of the transcription factor OTX2 (Orthodenticle homeobox 2) in VTA-mDA neurons *Salvio et al.*  
139 *(2010)*, *Panman et al. (2014)*, *Poulin et al. (2014)*, *Bifsha et al. (2017)*, *Manno et al. (2016)*. In E18.5  
140 control brains, TH<sup>+</sup>, OTX2<sup>+</sup> cells and TH<sup>+</sup>, SOX6<sup>+</sup> cells were clearly separated at the boundary  
141 between SN and lateral VTA (Figure 3D,F). In *Dab1* CKO mice, TH<sup>+</sup>, SOX6<sup>+</sup> and TH<sup>+</sup>, *Lmo3*<sup>+</sup> mDA  
142 neurons were more medially located than in controls and were partially intermingled with TH<sup>+</sup>,  
143 OTX2<sup>+</sup> mDA neurons (Figure 3D-I). Hence, the inactivation of Reelin signaling in mDA neurons results  
144 in an ectopic medial location of SN-mDA neurons and a partial mixing of the two populations at  
145 what would constitute the SN-lateral VTA border in control brains.

#### 146 **Time-lapse imaging of tangentially migrating mDA neurons reveals diverse migratory** 147 **behaviors across a population of neurons, and in individual neurons across time**

148 Having established the direct requirement of Reelin signaling in the tangential migration of  
149 SN-mDA neurons, we visualized their migration in the presence and absence of Reelin, thereby  
150 dissecting out the precise migratory behaviors regulated by Reelin signaling. To monitor mDA  
151 migration during development, sparse labeling of SN-mDA neurons is necessary to enable tracking  
152 and morphology analysis of their migration. We used an established genetic inducible fate mapping  
153 system to mosaically label SN-mDA progenitors and their descendants *Blaess et al. (2011)*, *Bodea*  
154 *et al. (2014)* (Figure 4A). With this system, SN-mDA neurons are preferentially labeled and more  
155 than two-thirds of YFP-labeled neurons are TH<sup>+</sup> in the imaged regions at E13.5, and almost 90% are  
156 TH<sup>+</sup> at E14.5 *Bodea et al. (2014)*. Henceforth, we refer to these YFP-labeled neurons as SN-mDA  
157 neurons.

158 *Ex vivo* horizontal organotypic slice cultures of the ventral brain from E13.5 embryos with mo-  
159 saically labelled SN-mDA neurons were prepared for time-lapse imaging *Bodea and Blaess (2012)*;  
160 *Bodea et al. (2014)* (Figure 4B). 2-photon excitation time-lapse microscopy allows 3D visualization of  
161 dynamic changes in cell morphologies of migrating SN-mDA neurons. As the migratory modes and  
162 associated changes in morphology of tangentially-migrating mDA neurons are unknown, we first  
163 defined migratory behavior in SN-mDA neurons using a number of parameters in slices of control  
164 mice and subsequently compared them with those of SN-mDA neurons in *Dab1*<sup>-/-</sup> slices.

165 To characterize the whole range of migratory behaviors within the time window of imaging,  
166 we acquired 3D volume images of slices every 10 minutes, and tracked soma positions of a large  
167 number of neurons (806 neurons from 3 control slices, 844 neurons from 3 *Dab1*<sup>-/-</sup> slices). We  
168 then calculated speed and trajectory for each neuron's soma, at every time-point of imaging, based  
169 on location differences in consecutive volume images (Figure 4C-F, Movie 1). Plotting average  
170 speed distributions of cells from each slice, showed that the behavior of cells in different control  
171 slices and in different *Dab1*<sup>-/-</sup> slices was comparable (Figure 4- figure supplement 1A,B). However,  
172 individual cells' soma speeds varied considerably over time, and the maximum observed soma  
173 speed (henceforth max-speed) of a cell could be several times higher than its average speed  
174 (Figure 4F). Furthermore, ranking all control and all *Dab1*<sup>-/-</sup> cells by their max-speeds revealed great  
175 diversity as the max-speeds varied across cells in a smooth distribution from 183  $\mu\text{m/hr}$  to 0  $\mu\text{m/hr}$   
176 for controls and from 134  $\mu\text{m/hr}$  to 0  $\mu\text{m/hr}$  for *Dab1*<sup>-/-</sup> cells (Figure 4- figure supplement 1C,D).

#### 177 **Two modes of tangential migration in SN-mDA neurons: frequent, slow movements and**

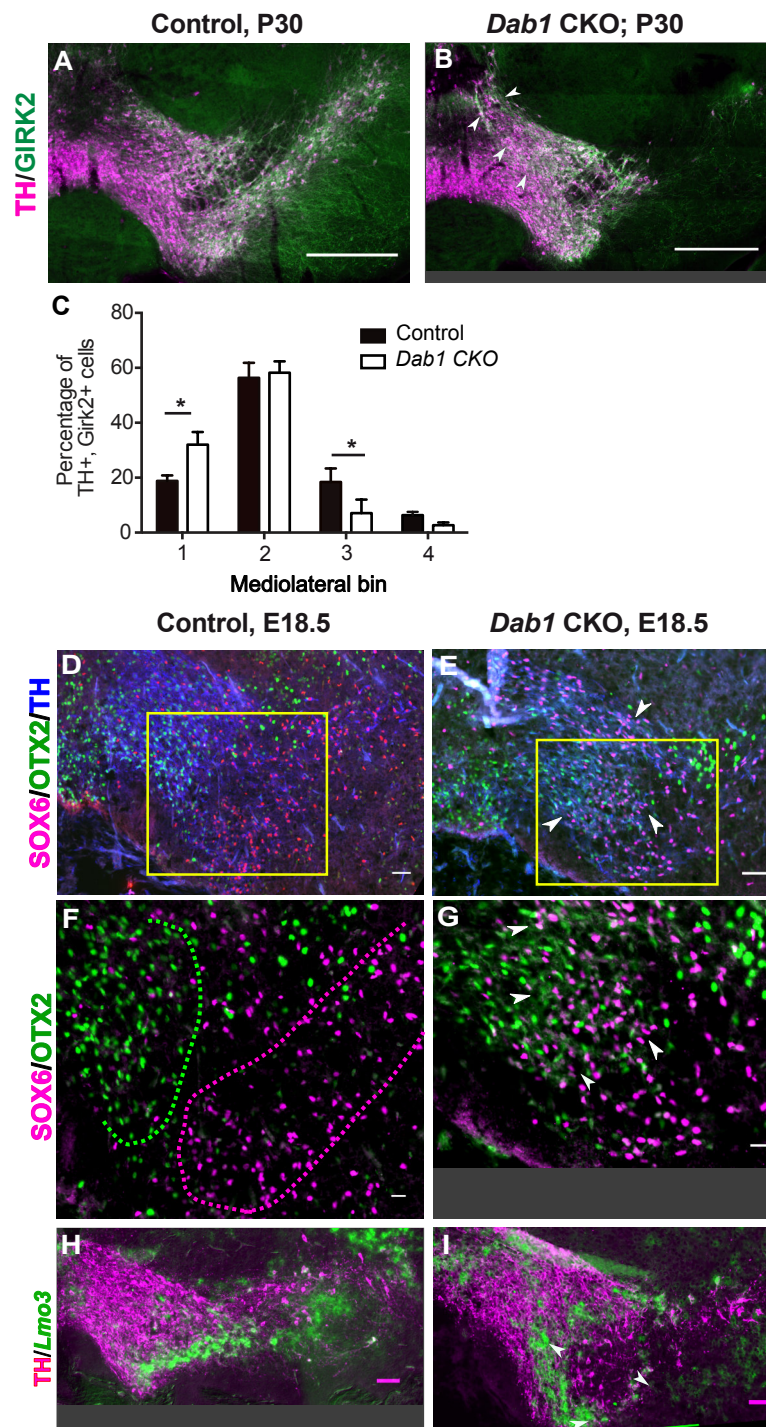

**Figure 3. SN-mDA neurons do not completely segregate from VTA-mDA neurons in the absence of Reelin signaling.** (A-C) Immunostaining for TH and GIRK2 in P30 *Dab1* CKO mice. White arrowheads: medial accumulation of TH<sup>+</sup>, Girk2<sup>+</sup> cells in *Dab1* CKO (B) compared to control littermates (A). TH<sup>+</sup>, Girk2<sup>+</sup> cells are shifted medially in *Dab1* CKO brains compared to controls (C). \*  $p < 0.05$ ; Student's t-test corrected for multiple comparisons (Holm-Sidak method) for  $n=3$  brains/genotype. (D,E) Immunostaining for SOX6 (magenta), OTX2 (green) and TH (blue) on E18.5 control and *Dab1* CKO brains. White arrowheads indicate altered distribution of TH<sup>+</sup>, SOX6<sup>+</sup> cells in *Dab1* CKO mice. Yellow boxes indicate regions presented in F and G. (F,G) Higher zoom of TH<sup>+</sup> lateral VTA region in (D,E). In controls, SOX6<sup>+</sup> cells (dashed magenta line) and OTX2<sup>+</sup> cells (dashed green line) are localized to separate regions (F). In *Dab1* CKO, SOX6<sup>+</sup> cells accumulate medially and are partially intermingled with OTX2<sup>+</sup> cells (white arrowheads) (G). (H,I) Immunostaining for TH and RNA *in situ* hybridization for *Lmo3* shows ectopic medial localization of TH<sup>+</sup>, *Lmo3*<sup>+</sup> cells in *Dab1* CKO (white arrowheads in I). *Lmo3* signal was inverted and false-colored in green. Cells in which *Lmo3* was detected, show weak TH immunostaining, as the strong *in situ* hybridization signal interferes with antibody binding. Scale bars: (A,B) 200  $\mu\text{m}$ , (D,E,H,I) 50  $\mu\text{m}$ , (F,G) 25  $\mu\text{m}$ .

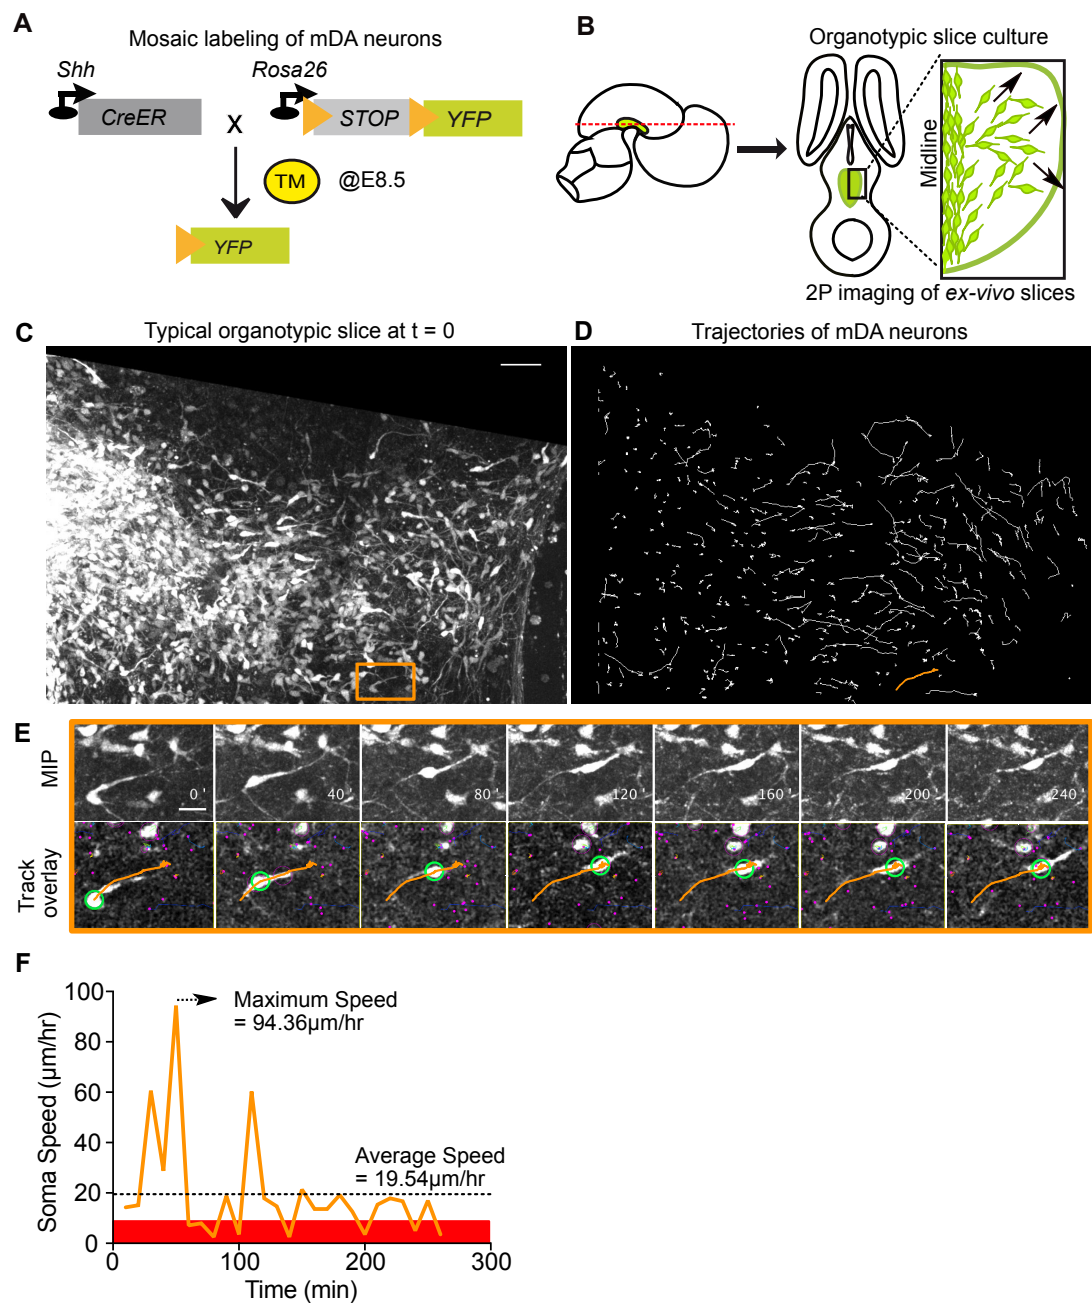

**Figure 4. Visualizing mDA tangential migration with 2-photon excitation microscopy.** (A) Schematic of the inducible genetic fate mapping system used to mosaically label mDA neurons by administering tamoxifen (TM) at E8.5. Shh: Sonic Hedgehog; YFP: yellow fluorescent protein. CreER: gene encoding a CRE-Estrogen Receptor fusion protein. (B) Schematic of horizontal organotypic slice culture preparations. Green regions represent location of mDA neurons in the embryonic brains (left) and horizontal slices (right). Red dashed line indicates dorsoventral level of slices. Black arrows indicate direction of tangential mDA migration. (C) Maximum intensity projection (MIP) of a control slice at  $t = 0$ . Orange rectangle indicates location of cell shown in (E). (D) Trajectories of tracked neurons in slice shown in (C) after imaging for 270 min. Trajectory in orange represents trajectory of neuron in (E). (E) MIP of time-lapse images show soma and processes of a tangentially migrating cell. Track overlays show the position of the soma (green circle) and trajectory of the cell (orange line) analyzed with the semi-automated tracking plugin TrackMate in Fiji. Magenta dots and circles represent tracked soma of close-by cells at different z-levels. (F) Speed profile of cell in (E) shows large variations in speed over time, with a maximum speed (dashed arrow) that is much higher than the average speed (dashed horizontal line). Rest phase (soma speed less than  $10 \mu\text{m/hr}$ ) is indicated in red. Scale bars: (C,D)  $50 \mu\text{m}$ , (E)  $20 \mu\text{m}$ .

**Figure 4 - Figure supplement 1.** Average speed distributions and speed profiles of SN-mDA neurons.

## 178 **infrequent, fast movements that are promoted by Reelin signaling**

179 The role of Reelin signaling has been studied extensively in the cortex and hippocampus.  
180 However, only few studies have examined Reelin function in regulating the speed of migrating  
181 neurons. These studies have shown that the effect of Reelin varies depending on the brain region  
182 and type of neuron analyzed *Simó et al. (2010)*; *Britto et al. (2013)*, *Britto et al. (2011)*, *Wang et al.*  
183 *(2018)*. We have previously demonstrated that inhibiting Reelin in *ex vivo* slices results in a decrease  
184 in average speed of SN-mDA neurons over long periods of imaging *Bodea et al. (2014)*. In our  
185 current analysis we found no significant difference in the distribution of average speeds of the  
186 SN-mDA population in *Dab1<sup>-/-</sup>* slices compared to control slices (Figure 5A). However, distribution  
187 of max-speeds was significantly shifted towards lower speeds in the absence of Reelin signaling  
188 (control: 25<sup>th</sup> percentile = 12.4  $\mu\text{m/hr}$ , median = 23.6  $\mu\text{m/hr}$ , 75<sup>th</sup> percentile = 48.1  $\mu\text{m/hr}$ , maximum  
189 = 183  $\mu\text{m/hr}$ ; *Dab1<sup>-/-</sup>*: 25<sup>th</sup> percentile = 10.1  $\mu\text{m/hr}$ , median = 15  $\mu\text{m/hr}$ , 75<sup>th</sup> percentile = 29.8  
190  $\mu\text{m/hr}$ , maximum = 133.7  $\mu\text{m/hr}$ ) (Figure 5B).

191 We then asked whether this shift towards lower max-speeds in *Dab1<sup>-/-</sup>* SN-mDA neurons was  
192 accompanied by other changes in migratory behavior, or whether the neurons simply displayed  
193 lower max-speeds while maintaining the same migratory, directional and morphological charac-  
194 teristics as control SN-mDA neurons. To answer this question, we compared variation in soma  
195 speed over time, migratory direction and cell morphology of control and *Dab1<sup>-/-</sup>* mDA neurons  
196 with similar max-speeds. For this analysis, we divided control and *Dab1<sup>-/-</sup>* neurons into four  
197 groups based on the lower and upper quartiles of the *Dab1<sup>-/-</sup>* max-speed distribution. We defined  
198 these groups in the following manner: non-migratory cells with max-speeds of less than 10  $\mu\text{m/hr}$   
199 (control = 126/806, *Dab1<sup>-/-</sup>* = 205/844), 'slow' cells with max-speeds from 10-30  $\mu\text{m/hr}$  (control  
200 = 355/806, *Dab1<sup>-/-</sup>* = 430/844), 'moderate' cells with max-speeds from 30-60  $\mu\text{m/hr}$  (control =  
201 186/806, *Dab1<sup>-/-</sup>* = 139/844) and 'fast' cells with max-speeds > 60  $\mu\text{m/hr}$ , control = 139/806, *Dab1<sup>-/-</sup>*  
202 = 70/844) (Figure 5B). Non-migratory cells failed to move more than 1.7  $\mu\text{m}$  in any two consecutive  
203 frames of analysis and were not included into the further analysis. Thus, a lower percentage of  
204 SN-mDA neurons reached moderate or fast migration speeds in *Dab1<sup>-/-</sup>* slices compared to controls,  
205 increasing the proportion of both non-migratory and 'slow' cells.

206 Next, we asked how frequently migrating SN-mDA neurons moved with soma speeds comparable  
207 to their max-speeds and whether the fraction of total time-points spent in high migratory speeds  
208 was different in control and *Dab1<sup>-/-</sup>* populations. To evaluate this, we used the criteria previously  
209 defined for max-speeds, but applied them to individual soma speeds for each cell at each time  
210 point. For example, we analyzed the fraction of time (percentage of total time-points) spent by each  
211 'fast' cell with a soma speed of more than 60  $\mu\text{m/hr}$  (fast migratory phase), 30-60  $\mu\text{m/hr}$  (moderate  
212 migratory phase), 10-30  $\mu\text{m/hr}$  (slow migratory phase) and less than 10  $\mu\text{m/hr}$  (resting phase). In  
213 control slices, 'fast', 'moderate' and 'slow' cells spent a predominant fraction of time at rest (62.6  
214 +/-20%; 68.5 +/-18.2%, 85.7 +/-11.1%, respectively) and were frequently in a slow migratory phase  
215 (26.8 +/-17.4%, 25.1 +/-16.3%, 14.2 +/- 11.1%, respectively). 'Fast' and 'moderate' cells achieved the  
216 moderate migratory phase in only a few frames (5.5 +/- 5.5% and 6.3 +/- 3.9, respectively), and the  
217 fast migratory phase (only in 'fast' cells) was equally infrequent (5.5 +/-2.2%) (Figure 5 B, Figure 5 -  
218 Figure supplement 1). The amount of time SN-mDA neurons of the same max-speed group spent in  
219 the resting phase or in the respective migratory phases was comparable between individual cells in  
220 control and *Dab1<sup>-/-</sup>* slices (Figure 5 - Figure supplement 1D-F).

221 In summary, these results demonstrate that SN-mDA migration has two distinct modes: a  
222 frequent slow migration phase seen in all migrating SN-mDA neurons and an infrequent moderate-  
223 to-fast phase occurring in a subset of SN-mDA neurons. These phases are superimposed over  
224 frequent periods of rest. Reelin signaling increases the proportion of migratory mDA neurons and  
225 the likelihood of moderate-to-fast movements in migrating mDA neurons. As moderate-to-fast  
226 migratory phases are only attained in very few frames in our slices, the average speed distribution  
227 of SN-mDA neurons are however not changed in *Dab1<sup>-/-</sup>* compared to control slices.

228 **The Reelin-promoted infrequent fast movements of mDA neurons contribute to large**



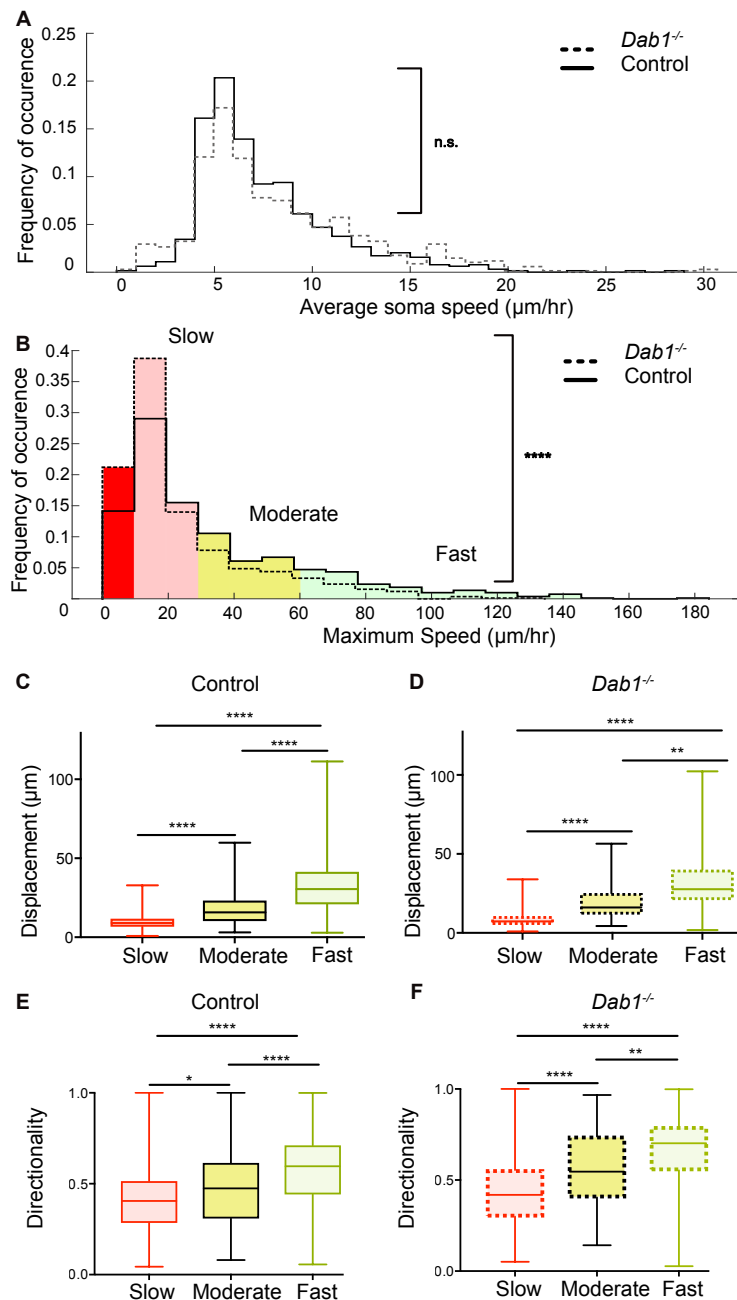

**Figure 5. Reelin promotes infrequent, fast movements in mDA neurons.** (A) Distribution of average soma speeds are not significantly altered in *Dab1*<sup>-/-</sup> slices ( $p = 0.0657$ , Mann-Whitney's test,  $n = 680$  control, 639 *Dab1*<sup>-/-</sup> mDA neurons). (B) *Dab1*<sup>-/-</sup> mDA neurons have significantly lower max-speeds compared to controls (\*\*\*\*  $p < 0.0001$ , Mann-Whitney's test,  $n = 806$  control, 844 *Dab1*<sup>-/-</sup> mDA neurons). Non-migratory (max-speed 0 - 10  $\mu\text{m/hr}$ ), slow (10 - 30  $\mu\text{m/hr}$ ), moderate (30 - 60  $\mu\text{m/hr}$ ) and fast cells (> 60  $\mu\text{m/hr}$ ) are indicated by dark red, light red, yellow and light green colors respectively. (C,D) Total displacement (3D) of mDA neurons is significantly higher in moderate compared to slow mDA neurons, and highest in fast mDA neurons in both control (C) and *Dab1*<sup>-/-</sup> (D) brains. (E,F) Directionality (defined as ratio of total displacement to path length) in control and *Dab1*<sup>-/-</sup> slices is the least in slow, higher in moderate and the highest in fast mDA neurons. (C-F) \*  $p < 0.05$ , \*\*  $p < 0.01$ , \*\*\*\*  $p < 0.0001$ , Kruskal-Wallis test;  $n = 680$  control;  $n = 639$  *Dab1*<sup>-/-</sup> cells, 3 slices/genotype. **Figure 5-Figure supplement 1.** Variation in instantaneous soma speed of mDA neurons. **Figure 5-Figure supplement 2.** Individual fast, moderate and slow mDA neurons from *Dab1*<sup>-/-</sup> slices have similar displacement and directionality profiles as control mDA neurons.

## 229 **directed cell displacements**

230 We next asked whether max-speeds and directionality of migration were linked. We computed  
231 directionality as the ratio of total displacement (the 3D displacement between the initial and  
232 final positions of the neurons) to path length (the distance travelled by each neuron summed  
233 up irrespective of direction) *Petrie et al. (2009)* for migrating SN-mDA populations in control and  
234 *Dab1<sup>-/-</sup>* slices. A high value of directionality (maximum value = 1) indicates almost no change  
235 in migratory direction while low values indicate frequent changes in direction. We found that  
236 directionality as well as total displacement generally increased with increasing max-speeds in SN-  
237 mDA populations from both control and *Dab1<sup>-/-</sup>* slices (Figure 5C-F; Figure 5 - Figure supplement 2).  
238 These data indicate that the infrequent moderate-to-fast movements in SN-mDA neurons result in  
239 major contributions to the directed migration of these cells. Since Reelin signaling increases the  
240 fraction of SN-mDA neurons that are able to undergo moderate-to-fast movements, Reelin supports  
241 directed migration of mDA neurons on a population level.

### 242 **Reelin promotes preference for laterally-directed migration in mDA neurons**

243 As tangential migration ultimately results in SN-mDA migration away from the midline, we  
244 analyzed the trajectories of migratory SN-mDA neurons in the presence and absence of Reelin  
245 signaling. We determined the “trajectory angle” for each cell as the angle between the midline  
246 (y-axis in live-images) and the cell's displacement vector (Figure 6A). Thus, a trajectory angle of 90°  
247 indicates a cell whose total movement is precisely aligned to the lateral axis (x-axis in live-images).  
248 We defined a cell as migrating laterally if its trajectory angle was between 45 – 135°. We then  
249 evaluated the angular mean and standard deviation ( $\sigma_{ang}$ ) for SN-mDA populations in control and  
250 *Dab1<sup>-/-</sup>* slices *Berens (2009)*. We found that SN-mDA neurons from control slices displayed an  
251 anisotropy towards lateral migratory directions (mean 92.5°,  $\sigma_{ang}$  68.4) while *Dab1<sup>-/-</sup>* SN-mDA  
252 neurons showed a significantly reduced preference for lateral migration (mean 27.5°,  $\sigma_{ang}$  70.4)  
253 (see materials and methods for analysis of circular variables)(Figure 6B-D).

254 Next, to evaluate if ‘fast’, ‘moderate’ and ‘slow’ cell populations of control and *Dab1<sup>-/-</sup>* slices  
255 showed differences in their preference for lateral migration, we analyzed their trajectories separately.  
256 We found that trajectories of all three SN-mDA groups were anisotropic in controls, favoring  
257 migration towards lateral directions, but this anisotropy was greater in ‘fast’ and ‘moderate’ cells  
258 than in ‘slow’ cells (Figure 7A,D,G). Resolving this further into individual slow, moderate and fast  
259 migratory phases in the migratory mDA population, we also found that individual moderate-to-fast  
260 phases were more anisotropic than slow phases (Figure 7- Figure supplement 1A,C,E).

261 In the absence of Reelin signaling, the trajectory profiles of ‘slow’ neurons were significantly  
262 altered with a complete loss of anisotropy towards lateral directions (mean -12.3°,  $\sigma_{ang}$  69.7°) (Fig-  
263 ure 7B,C). In contrast, ‘moderate’ and ‘fast’ neurons still navigated to more lateral regions in *Dab1<sup>-/-</sup>*  
264 slices and their trajectory angle distributions were nearly identical to control neurons (*Dab1<sup>-/-</sup>*  
265 ‘moderate’ neurons: mean 69.4°,  $\sigma_{ang}$  58.7°; ‘fast’ neurons: mean 81°,  $\sigma_{ang}$  57.9°;) (Figure 7D-I). This  
266 finding also applies to slow, moderate and fast phases: slow phases are weakly laterally directed in  
267 controls, but in the absence of Reelin signaling individual slow migratory movements lose their slight  
268 lateral preference (Figure 7- figure supplement 1B,D,F and data not shown). These results show  
269 that Reelin signaling promotes lateral migration of SN-mDA neurons by increasing the fraction of  
270 SN-mDA neurons undergoing moderate-to-fast movements that are strongly biased for tangential  
271 movements and by promoting lateral anisotropy of ‘slow’ neurons.

### 272 **mDA neurons adopt a bipolar morphology during moderate-to-fast phases of migration**

273 Having thus defined the complex regulation of SN-mDA speed and trajectory profiles by Reelin  
274 signaling, we investigated the cellular morphology that underlies mDA tangential migration. Since  
275 the dynamic cell morphologies of migrating SN-mDA neurons have not been assessed previously,  
276 we first evaluated morphological changes in control SN-mDA neurons. Some cells had a stable,  
277 unbranched leading process (LP), and did not change their morphology, while other cells displayed  
278 dynamic LPs, that extended, retracted and branched frequently over time (Figure 8A-D; Figure 8 -  
279 Figure supplement 1; Movie 2).

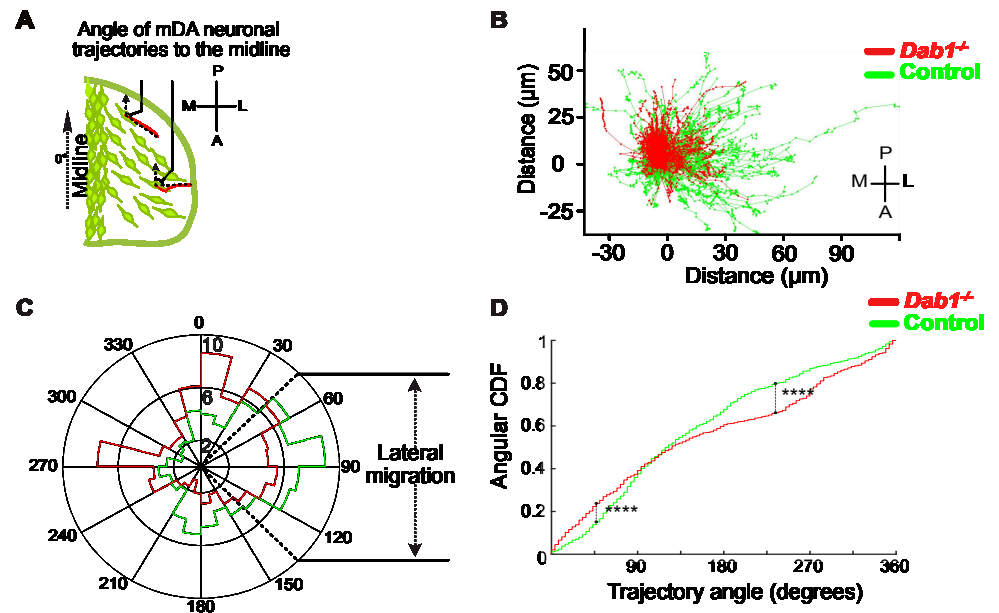

**Figure 6. mDA lateral migration is reduced in the absence of Reelin signaling** (A) Schematic showing trajectory angle measurement. (B) Trajectories of control (green) and *Dab1*<sup>-/-</sup> (red) mDA neurons from 1 control and 1 *Dab1*<sup>-/-</sup> slice imaged over the same duration, plotted relative to their starting point show loss of lateral directionality in *Dab1*<sup>-/-</sup> mDA neuron trajectories. (C) Polar histogram for angle of the mDA trajectories to the midline (0°) for all control (green) and *Dab1*<sup>-/-</sup> (red) mDA neurons analyzed. (D) Circular statistical analysis for angular distributions in (C) of control (green) and *Dab1*<sup>-/-</sup> (red) mDA neurons shows significant decrease in lateral anisotropy for *Dab1*<sup>-/-</sup> slices (\*\*\*\*  $p < 0.0001$ , Kuiper's test for circular variables;  $n = 680$  control,  $n = 639$  *Dab1*<sup>-/-</sup> mDA neurons).

280 We studied the cell morphology of SN-mDA neurons (70 'fast', 40 'moderate' and 40 'slow' cells)  
 281 in control and in *Dab1*<sup>-/-</sup> slices (49 'fast', 40 'moderate' and 40 'slow' cells) and examined whether  
 282 slow, moderate and fast migratory phases were associated with specific morphologies (for details  
 283 of morphological analysis see materials and methods). We defined three morphological categories:  
 284 a neuron was considered to be 'bipolar-unbranched' when a maximum of two processes arose  
 285 directly from the soma and the LP was unbranched. Bipolar cells that extended a branched LP  
 286 were defined as 'bipolar-branched'. Neurons with more than two processes arising from the soma  
 287 were defined as 'multipolar' (Figure 8A,C; Figure 8 – Figure supplement 1). The morphology of  
 288 SN-mDA neurons evaluated based on YFP expression was indistinguishable from their morphology  
 289 as assessed by TH-immunostaining in cleared whole-mount brains at E13.5 (Movie 3).

290 To investigate whether specific morphologies observed in SN-mDA neurons were associated  
 291 with specific migratory speeds, we broke down the morphology of these cells into time points  
 292 during which they were in bipolar-unbranched, bipolar-branched or multipolar phases (Figure 8  
 293 A,C, Figure 8 – Figure supplement 1) and paired their morphology with soma speed (as calculated  
 294 by change in soma position between the current and the subsequent time point). Bipolarity was  
 295 predominant in all phases of migration, but in both control and *Dab1*<sup>-/-</sup> SN-mDA neurons, fast  
 296 and moderate migratory phases were almost exclusively associated with bipolar morphology. In  
 297 contrast, about a third of slow migratory phases were associated with multipolar morphology.  
 298 Hence, while slow migratory phases can occur in either bipolar or multipolar morphology, fast and  
 299 moderate migration events are predominantly associated with bipolar morphology.

300 **mDA neurons display unstable branch and leading process morphology in the absence**

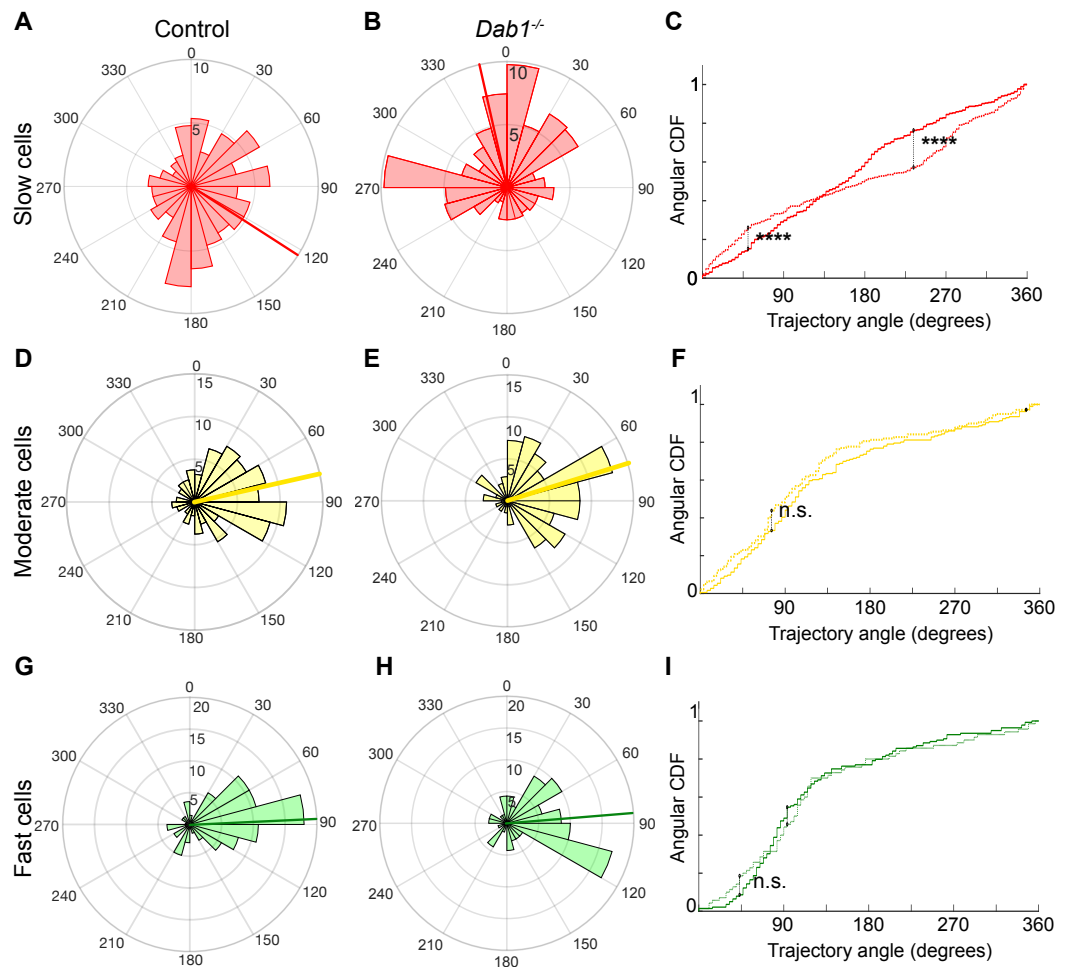

**Figure 7. Reelin promotes preference for lateral migration in slow mDA neurons.** (A,B) Polar histogram for angle of slow mDA trajectories to the midline shows that slow cells have the least preference for lateral migratory direction in both control (A) and *Dab1*<sup>-/-</sup> (B) slices. (C) Circular statistical analysis for angular distributions of slow mDA neurons shows significant loss of preference for lateral migration in slow *Dab1*<sup>-/-</sup> mDA neurons compared to controls (\*\*\*\*  $p < 0.0001$ , Kuiper's test for circular variables;  $n = 355$  control, 480 *Dab1*<sup>-/-</sup> mDA neurons). (D-I) Moderate (D,E) and fast (G,H) mDA neurons (G,H) show high preference for lateral migration. Moderate (F) ( $n = 186$  control,  $n = 139$  *Dab1*<sup>-/-</sup> mDA neurons) and fast (I) ( $n = 139$  control,  $n = 70$  *Dab1*<sup>-/-</sup> mDA neurons) are laterally directed and their angular distributions are comparable in control and *Dab1*<sup>-/-</sup> slices. Red (A,B), yellow (D,E) and green (G,H) lines represent mean angular direction for slow, moderate and fast populations, respectively. **Figure 7 - Figure supplement 1.** Lateral migration occurs during moderate and fast migratory phases of mDA neurons.

### 301 **of Reelin signaling**

302 In time-lapse data-sets, some mDA neurons transitioned between bipolar and multipolar mor-  
 303 morphology, while others maintained either a bipolar or multipolar morphology during imaging. We  
 304 next examined the proportions of migrating SN-mDA neurons that displayed a constant bipo-  
 305 lar (branched and unbranched), constant multipolar or transitional morphology over time (Fig-  
 306 ure 8A,C; Figure 8 – Figure supplement 1). This analysis enabled us to ask whether morphological  
 307 stability is altered in the absence of Reelin signaling. In controls, transitional cells made up about  
 308 40% of the total population. The proportion of transitional cells was significantly increased in the  
 309 *Dab1*<sup>-/-</sup> population, while the population of bipolar neurons was decreased (Figure 9A, Table 1 ).  
 310 Within the transitional population, we found however no difference in the frequency of transitions  
 311 between bipolar and multipolar morphologies for each neuron (defined as number of morphology

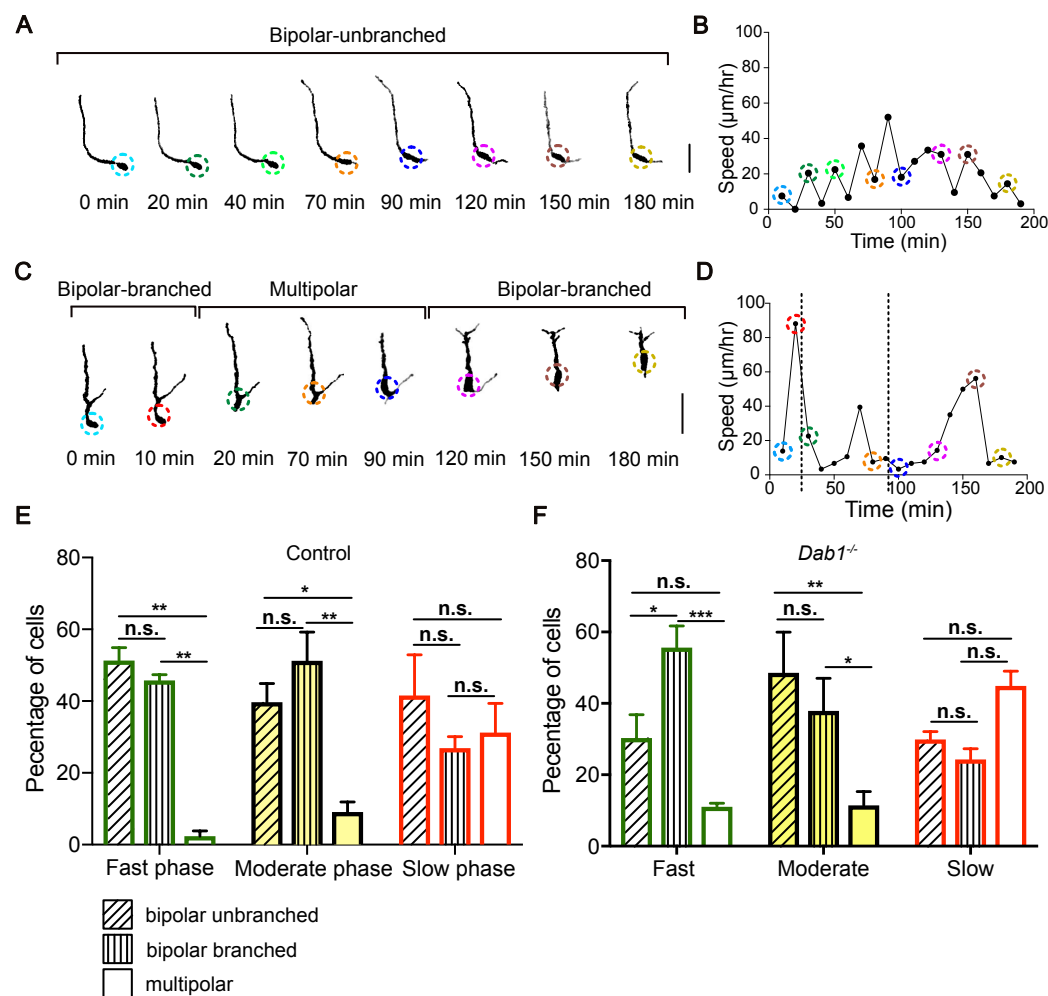

**Figure 8. Moderate-to-fast migratory phases are strongly associated with bipolar morphologies in mDA neurons.** (A) Control mDA neuron displaying a 'bipolar-unbranched' morphology at all analyzed time-points. (B) Soma speed profile of mDA neuron shown in (A). (C) Control mDA neuron transitioning between bipolar and multipolar morphology. At  $t = 0$  min, the cell has a branched leading process (LP), the cell soma moves along the LP to reach the branch-point and takes up a multipolar morphology ( $t = 20$  min). The cell remains multipolar until  $t = 90$  min, after which one process is retracted ( $t = 120$  min) and the cell resumes a bipolar morphology ( $t = 150$  min). Bipolar phase: one or two processes arise directly from the soma. Multipolar phase: more than two processes arise directly from the soma. (A,C) Colored circles: soma as defined by the tracking process. Scale bar:  $25 \mu\text{m}$ . (D) Soma speed for the neuron in (C) is higher during its bipolar phase. (E,F) Proportion of bipolar unbranched and branched morphology is significantly higher during fast and moderate phases of migration, while slow phase shows higher proportion of multipolar cells in both control (E) and *Dab1*<sup>-/-</sup> (F) mDA neurons (\*  $p < 0.05$ , \*\*  $p < 0.005$ , \*\*\*  $p < 0.001$ , \*\*\*\*  $p < 0.0001$ ; two-way ANOVA). **Figure 8 - Figure supplement 1.** Morphological characterization of mDA neurons

312 transitions per hour) in *Dab1*<sup>-/-</sup> compared to control slices (Figure 9). We then examined the  
 313 appearance and disappearance of processes both on the soma and the LP of transitional neurons  
 314 ( $n = 64$  in control,  $n = 70$  in *Dab1*<sup>-/-</sup>) in further detail (Figure 9C; Figure 9 - Figure supplement 1).  
 315 We found that these branch transition events were significantly more frequent in *Dab1*<sup>-/-</sup> SN-mDA  
 316 transitional neurons (Figure 9D), since *Dab1*<sup>-/-</sup> neurons displayed short, transient protrusions that  
 317 appeared on the soma and LP for only a few time frames before disappearing (Figure 9 - Figure  
 318 supplement 1).

319 Finally, we randomly selected 20 control and 20 *Dab1*<sup>-/-</sup> mDA neurons with maximum soma  
 320 speed of more than  $10 \mu\text{m/hr}$  and manually traced their morphology in 3D for the first 19 imaging  
 321 time-points (Figure 9 - Figure supplement 2). In all control and *Dab1*<sup>-/-</sup> mDA neurons, the LP

322 remained stable and visible during the duration of imaging. We then compared the length of the  
 323 LP (plus cell body) in control and *Dab1*<sup>-/-</sup> mDA neurons and found that mDA neurons in *Dab1*<sup>-/-</sup>  
 324 slices displayed a broader distribution of LP length with very long and very short LPs (Figure 9 -  
 325 Figure supplement 2G). Hence, in the absence of Reelin signaling, SN-mDA neurons display aberrant  
 326 changes in morphology characterized by an increased proportion of transitional neurons, an  
 327 increase in unstable processes on the cell soma and LP and a greater variation in LP length.

**Table 1.** Morphology of mDA neurons in control and *Dab1*<sup>-/-</sup> slices

| Cell type | Morphology   | Control |         |         | Dab1 <sup>-/-</sup> |         |         |
|-----------|--------------|---------|---------|---------|---------------------|---------|---------|
|           |              | Slice 1 | Slice 2 | Slice 3 | Slice 1             | Slice 2 | Slice 3 |
| Fast      | Bipolar      | 15/27   | 12/26   | 7/17    | 5/16                | 6/15    | 5/18    |
|           | Transitional | 12/27   | 13/26   | 10/17   | 9/16                | 8/15    | 12/18   |
|           | Multipolar   | 0/27    | 1/26    | 0/17    | 2/16                | 2/15    | 1/18    |
| Moderate  | Bipolar      | 8/16    | 4/10    | 4/14    | 4/13                | 5/19    | 5/8     |
|           | Transitional | 7/16    | 6/10    | 10/14   | 9/13                | 14/19   | 3/8     |
|           | Multipolar   | 1/16    | 0/10    | 0/14    | 0/13                | 0/19    | 0/8     |
| Slow      | Bipolar      | 3/11    | 7/12    | 7/17    | 5/14                | 5/15    | 2/11    |
|           | Transitional | 2/11    | 1/12    | 3/17    | 5/14                | 5/15    | 5/11    |
|           | Multipolar   | 6/11    | 4/12    | 7/17    | 4/14                | 5/15    | 4/11    |

### 328 Reelin downstream signaling in the ventral midbrain

329 As it is not known which downstream components of the Reelin signaling pathway regulate  
 330 SN-mDA tangential migration, we investigated Reelin signaling events that were previously shown to  
 331 influence neuronal polarity in migrating neurons in the cortex, hippocampus or spinal cord. Reelin  
 332 signaling results in the activation (phosphorylation) of PI3K (Phosphatidylinositol-4,5-bisphosphate  
 333 3-kinase) through DAB1 *Jossin and Goffinet (2007)*. PI3K activation results in phosphorylation  
 334 (activation) of LIMK1 (Lim domain kinase 1) via Rac1/Cdc42 and PAK1. P-LIMK1 inactivates (phos-  
 335 phorylates) Cofilin1, an actin depolymerizing protein of the ADF/Cofilin family. Reelin-mediated  
 336 inactivation of Cofilin 1 ultimately leads to the stabilization of the actin cytoskeleton and has been im-  
 337 plicated in stabilizing LPs of radially migrating cortical neurons as well as in preventing the aberrant  
 338 tangential migration of neurons of the autonomous nervous system in the spinal cord *Maciver and*  
 339 *Hussey (2002), Krüger et al. (2010), Franco et al. (2011), Chai et al. (2009); Frotscher et al. (2017)*.  
 340 To detect a potential misregulation of these downstream events in absence of Reelin signaling,  
 341 we performed immunoblotting on E14.5 embryonic ventral midbrain tissue for p-LIMK1/LIMK1  
 342 and p-Cofilin1/Cofilin1. We did not detect significant differences in protein levels or in relative  
 343 phosphorylation levels (Figure 10 and data not shown). Hence, we conclude that the regulation of  
 344 LIMK1/Cofilin1 activity is unlikely to be the key event in controlling cytoskeletal stability in migrating  
 345 mDA neurons downstream of Reelin signaling.

346 Next, we examined Cadherin2 (CDH2) expression in the ventral midbrain. Reelin signaling  
 347 controls somal translocation of radially migrating cortical neurons by modulating cell adhesion  
 348 properties through regulation of CDH2 via the Crk/C3G/Rap1 pathway *Franco et al. (2011)*. Relative  
 349 protein levels of CDH2 were similar in tissue lysates from control and *Dab1*<sup>-/-</sup> E14.5 ventral midbrain  
 350 (Figure 10 - Figure supplement 1). Whether CDH2 levels are altered at the membrane of mDA  
 351 neurons in *Dab1*<sup>-/-</sup> mice could not be assessed, since the immunostaining for CDH2 on sections  
 352 was not of sufficient quality to make a clear assessment of changes in membrane localization.

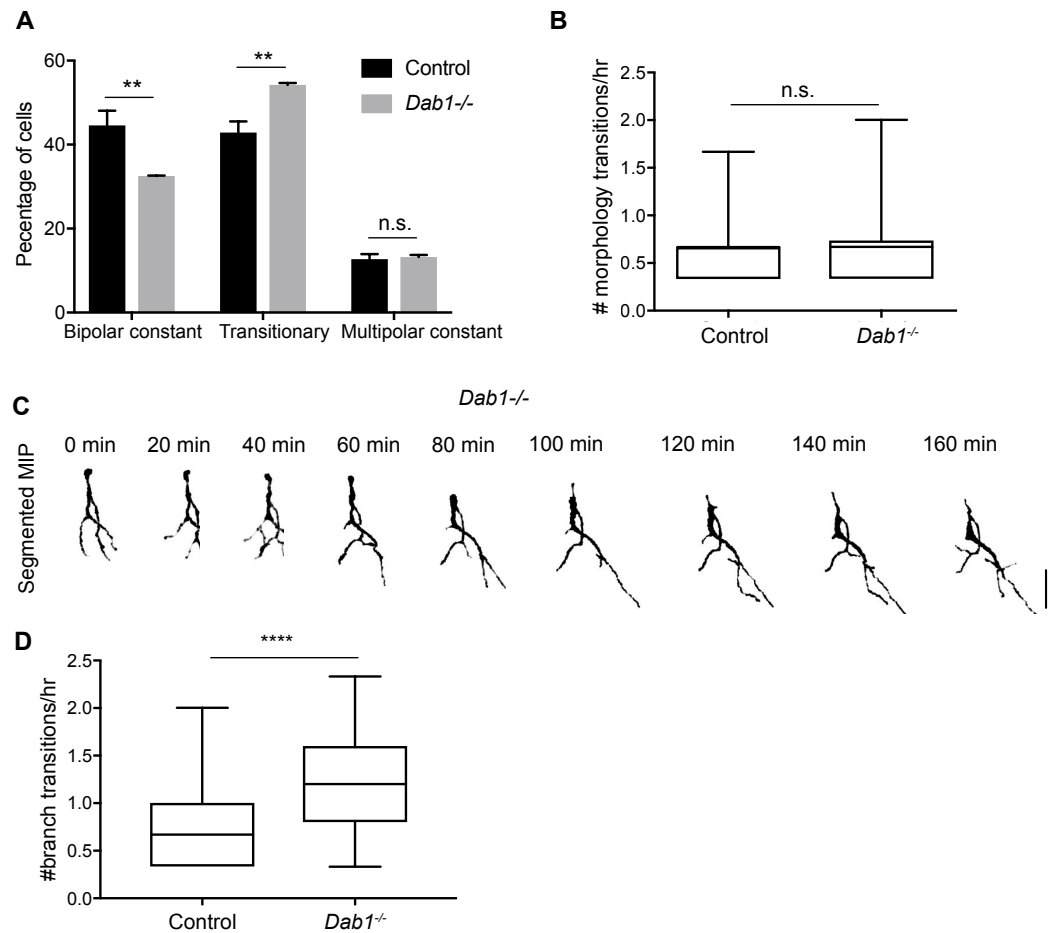

**Figure 9. Decreased stability of neuronal morphology in mDA neurons.** (A) Relative proportion of constantly bipolar mDA neurons are decreased, while transitory mDA neurons are increased in *Dab1*<sup>-/-</sup> slices. (B) Frequency of transitions from multipolar to bipolar phase (and vice versa) are not significantly altered in the absence of Reelin signaling ( $p = 0.6922$ ; Mann-Whitney's test). (C) Bipolar and multipolar phase of a *Dab1*<sup>-/-</sup> transitory mDA neuron. In this example, the bipolar phase lasts from  $t=0$  min to  $t=60$  min. In the multipolar phase (starting at  $t=80$  min) many, unstable protrusions form. Scale bar:  $25 \mu\text{m}$ . See Figure 9- Figure supplement 1 for more detail. (D) Quantification of appearance and disappearance of branches (defined as branch transitions per hour) in control and *Dab1*<sup>-/-</sup> mDA transitory neurons shows a significant increase in branch transitions in mDA neurons in *Dab1*<sup>-/-</sup> slices (\*\*\*\*  $p < 0.0001$ ; Mann-Whitney's test). **Figure 9 - Figure supplement 1.** Absence of Reelin signaling results in the formation of unstable protrusions on the soma and leading process of mDA neurons.

**Figure 9 - Figure supplement 2.** Greater spread in length of leading process in *Dab1*<sup>-/-</sup> mDA neurons.

## 353 Discussion

354 The correct tangential migration of mDA neurons is crucial for the formation of the SN. Our  
 355 study provides the first comprehensive insight into speed, trajectory and morphology profiles of  
 356 tangentially migrating mDA neurons, and uncovers the alterations of tangential migratory behavior  
 357 that result in aberrant SN formation in the absence of Reelin signaling (Figure 11).

### 358 Reelin signaling directly regulates tangential migration of SN-mDA neurons

359 A number of previous studies established the importance of Reelin in the formation of the  
 360 SN *Kang et al. (2010)*, *Nishikawa et al. (2003)*, *Sharaf et al. (2013)*, *Bodea et al. (2014)*, but it re-  
 361 mained to be elucidated whether Reelin is directly required for the tangential migration of SN-mDA  
 362 neurons. Studies in cortex have shown that while Reelin is directly required for the stabilization of  
 363 the LP and for the orientation of radially-migrating cortical projection neurons *Franco et al. (2011)*,  
 364 Reelin also indirectly affects migration through regulating radial glia cell process extension, morphol-

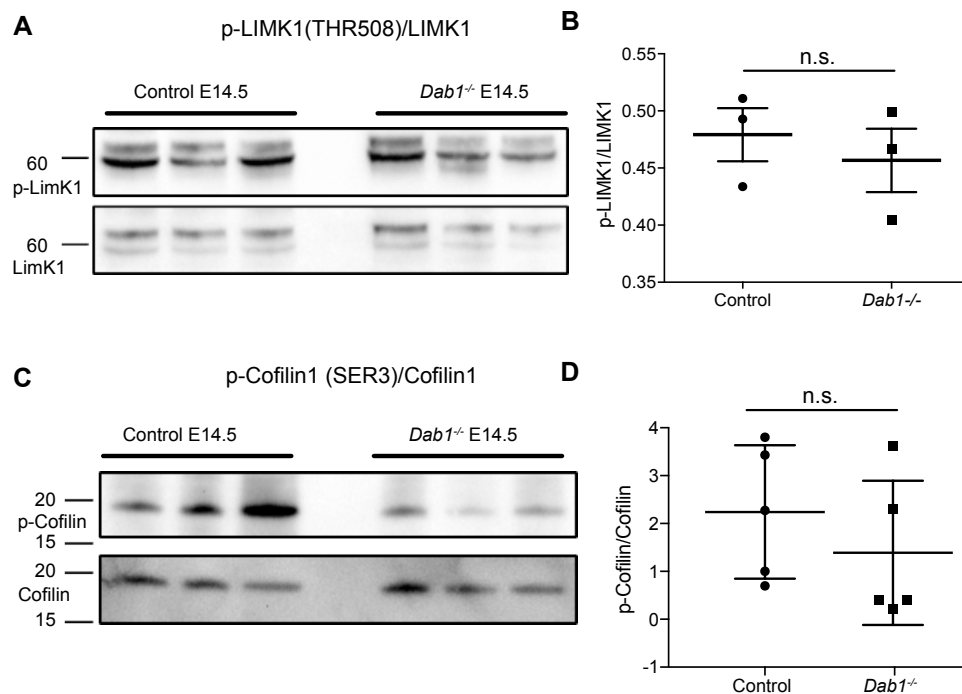

**Figure 10. Phosphorylation levels of proteins in the canonical Reelin signaling pathway are not altered in *Dab1*<sup>-/-</sup> ventral midbrain at E14.5.** (A,B) Relative phosphorylation levels of LIMK1 are not significantly altered in *Dab1*<sup>-/-</sup> ventral midbrains.  $p = 0.5682$ , Student's t-test ( $n = 3$  brains/genotype). (C,D) Relative phosphorylation levels of Cofilin1 are not significantly changed in *Dab1*<sup>-/-</sup> ventral midbrains.  $p = 0.8832$ , Student's t-test ( $n = 5$  brains/genotype). **Figure 10 - Figure supplement 1.** CDH2 expression levels in the ventral midbrain of control and *Dab1*<sup>-/-</sup> brains at E14.5.

ogy and maturation *Hartfuss et al. (2003), Keilani and Sugaya (2008)*. Tangentially migrating cortical interneurons are only indirectly affected by Reelin signaling: the improper cortical layering caused by defective radial migration in absence of Reelin signaling ultimately results in incorrect positioning of interneurons *Yabut et al. (2007)*. Reelin also plays a role in interneuron precursors that undergo tangential chain migration to the olfactory bulb. However, it does not modulate tangential migration directly but rather acts as a detachment signal that regulates the switch from tangential chain migration to radial migration *Hack et al. (2002)*. Evidence for a direct function of Reelin signaling in tangential neuronal migration comes from sympathetic preganglionic neurons in the spinal cord. In these neurons, Reelin has been shown to stabilize LPs via the phosphorylation of Cofilin 1 during tangential migration thereby preventing aberrant migration *Krüger et al. (2010), Phelps (2002)*.

To explore whether Reelin has a direct role in tangential migration of SN-mDA neurons, we inactivated *Dab1* in SN-mDA neurons starting at the onset of their tangential migration without affecting their earlier radial migration step and without inactivating *Dab1* in other cell populations in the ventral midbrain. The similarity in mediolateral distribution of SN-mDA neurons in *Dab1*<sup>-/-</sup> and in *Dab1* CKO implies that Reelin signaling has a direct effect on migrating SN-mDA neurons. We also confirmed that the GIRK2-expressing mDA population, which consists of lateral VTA- and SN-mDA neurons was distributed in a similar manner than what we reported previously for *Dab1*<sup>-/-</sup> mice *Bodea et al. (2014)*. Investigation of additional markers that label SN-mDA neurons more specifically, such as *Lmo3* and *SOX6*, showed that the medially misplaced SN-mDA neurons were partially intermingled with VTA-mDA neurons. These results imply that in absence of Reelin signaling in mDA neurons, the separation of SN- and VTA-mDA neurons is not fully completed and SN-mDA neurons lose their ability to undergo the long-range tangential migration necessary to form the laterally-positioned SN. Thus, our findings are the first demonstration of Reelin as a direct regulator



388 of tangential neuronal migration in the brain.

### 389 **Reelin protein is localized in the lateral ventral midbrain**

390 In the ventral midbrain, *Reelin* mRNA is restricted to the cells of the red nucleus at E13.5  
391 and E14.5 *Bodea et al. (2014)* (Figure 2). Using immunostaining, we show that Reelin protein is  
392 distributed much more broadly at these stages. Strong labeling is seen in regions lateral to the  
393 migrating SN-mDA, while weaker staining is observed in the area where SN-mDA neurons are  
394 localized. Thus, the Reelin protein distribution that we describe here is consistent with a direct  
395 role of Reelin in regulating SN-mDA migration. Whether the red nucleus is the only source for  
396 Reelin in the ventral midbrain or whether there are additional sources remains to be investigated.  
397 Mouse mutants in which the RN is only partially formed do not show any obvious displacement of  
398 SN-mDA neurons (at least not up to E18.5), suggesting that other Reelin sources could be important  
399 for mDA migration *Prakash et al. (2009)*. *Reelin* mRNA is expressed anterior to the SN, in the  
400 hypothalamus and ventral thalamus *Alcántara et al. (1998)*. Moreover, it has been proposed that  
401 Reelin is transported from the striatum to the SN via axons in the striatonigral pathway *Nishikawa*  
402 *et al. (2003)*. Indeed, Reelin is expressed in the early differentiating cells in the striatum, but the  
403 striatonigral pathway is probably only established (E17 in rat) after the critical time period for  
404 SN-mDA migration *Fishell and Kooy (1987)*, *Alcántara et al. (1998)*.

### 405 **Reelin promotes the proportion of mDA neurons undergoing fast, directed migration**

406 The visualization and tracking of a large population of migrating mDA neurons, and the sub-  
407 sequent categorization of the instantaneous soma speed of individual mDA neurons into slow,  
408 moderate and fast phases revealed that irrespective of their max-speed, mDA neurons spent a  
409 majority of their time at rest. During their migratory phase, mDA neurons move mostly at slow  
410 speed. Moderate-to-fast laterally-directed migration spurts that result in large displacements are  
411 infrequent and occur in only a subset of labeled mDA neurons during the time-window of imaging.  
412 Thus, mDA neurons migrate in two modes: in a frequent, slow mode and in infrequent, fast move-  
413 ments with a strong lateral orientation. A similar pattern of migration with variable instantaneous  
414 speeds and periods of rest has also been reported for newly generated granule cells in the dentate  
415 gyrus and for cortical projection neurons *Simó et al. (2010)*, *Wang et al. (2018)*.

416 Comparing mDA tangential migration in the presence and absence of Reelin signaling, we  
417 observed that the duration of the individual migratory phases as well as average speed distribution  
418 of mDA neurons was comparable between control and *Dab1<sup>-/-</sup>* slices, while the likelihood of  
419 moderate-to-fast migration events was decreased in mDA neurons in *Dab1<sup>-/-</sup>* slices. In addition, a  
420 higher proportion of mDA neurons spent the entire imaging period at rest. Hence, Reelin promotes  
421 the likelihood with which moderate-to-fast migration spurts occur and increases the proportion of  
422 cells that enter a migratory phase.

423 Interestingly, the increased presence of activated DAB1 in cortical projection neurons as a  
424 consequence of reduced ubiquitylation and degradation in absence of the E3 ubiquitin Ligase  
425 Cullin-5 leads to the opposite effect in the migratory behavior of these neurons: periods of rest  
426 are decreased and average as well as instantaneous speed is increased at late stages of cortical  
427 migration (E16.5) *Simó et al. (2010)*. This would be consistent with the role of Reelin that we observe  
428 in the migration of mDA neurons. In contrast, average speed appears not to be altered in cortical  
429 neurons of *reeler* mutants at this stage of development *Chai et al. (2016)*. Observation of cortical  
430 projection neurons in their multipolar-to-bipolar transition phase at E15.5 suggests yet another  
431 effect of Reelin: at this stage cortical neurons were observed to migrate faster in the absence of  
432 Reelin signaling while addition of exogenous Reelin slowed down migrating neurons, but only within  
433 the subventricular zone *Britto et al. (2011)*, *Britto et al. (2013)*. Thus, even in the same neuronal  
434 population, Reelin signaling might have diverse effects on the speed of neuronal migration at  
435 different stages of migration.

### 436 **Reelin promotes a preference for directed migration**

437 While moderate-to-fast migratory events are less likely in the *Dab1<sup>-/-</sup>* mDA population, individual  
438 moderate-to-fast *Dab1<sup>-/-</sup>* mDA neurons are equally laterally-directed as control mDA neurons. In

439 contrast, slow cells, which are weakly anisotropic in controls are significantly more isotropic in  
440 *Dab1*<sup>-/-</sup> slices. The loss of the laterally-directed slow movements might interfere with mDA neuron's  
441 ability to initiate moderate-to-fast, laterally-directed spurts. Indeed, mDA neurons have an aberrant  
442 orientation in E13.5 *reeler* brains *Bodea et al. (2014)*. In the cortex, Reelin regulates orientation  
443 and cell polarity of multipolar neurons in the intermediate zone facilitating their switch to bipolar,  
444 glia-dependent migration *Gärtner et al. (2012)*, *Gil-Sanz et al. (2013)*, *Jossin and Cooper (2011)*.  
445 Cortical projection neurons in their early phase of migration have been shown to deviate from radial  
446 migratory trajectories, in the absence of Reelin signaling as well as in the presence of exogenous  
447 Reelin *Britto et al. (2011)*, *Britto et al. (2013)*, *Chai et al. (2016)*. Reelin also promotes directionality  
448 during the radial migration of dentate gyrus cells *Wang et al. (2018)*. Interestingly, a recent study  
449 provides evidence that mDA neurons derived from induced pluripotent stem cells homozygous  
450 or heterozygous for a *REELIN* deletion show a disruption in their directed migratory behavior in  
451 neurosphere assays. Since the disruption occurs in absence of any organized tissue structure,  
452 Reelin signaling seems to modulate the ability of mDA neurons for directed migration independently  
453 of a specific pattern of Reelin protein deposition in the surrounding tissue *Arioka et al. (2018)*. In  
454 conclusion, Reelin appears to be a crucial factor in enabling SN-mDA neurons to initiate directed  
455 migration rather than a factor that guides SN-mDA neurons in a particular direction.

#### 456 **Reelin signaling promotes stable morphologies in SN-mDA neurons**

457 We show that moderate and fast movements of mDA neurons are strongly associated with bipo-  
458 lar morphologies both in control and *Dab1*<sup>-/-</sup> slices. Bipolarity is still predominant in slow phases,  
459 but about a third of the slow phases are associated with a multipolar morphology. In control slices,  
460 more than half of mDA neurons maintain a bipolar morphology throughout the imaging period,  
461 while about 40% transition between multipolar and bipolar morphologies. Only a small subset of  
462 cells (about 10%) stays multipolar at all time points. In absence of Reelin signaling, the percentage  
463 of transitional cells is significantly increased, and the proportion of stable bipolar cells is decreased.  
464 Interestingly, the increase in the proportion of transitional cells in *Dab1*<sup>-/-</sup> slices is particularly  
465 pronounced in the cell population that does not reach moderate-to-fast migration speeds and that  
466 is significantly more isotropic (data not shown) suggesting a correlation between loss of anisotropy  
467 in these cells and increased transitioning between bipolar and multipolar morphology. In tran-  
468 sitionary cells of *Dab1*<sup>-/-</sup> slices, there is a significant increase in branch transitions at the soma  
469 and LP, a sign of decreased branch stability. Moreover, the length of the LP is significantly more  
470 variable in *Dab1*<sup>-/-</sup> than in control neurons. Thus, Reelin signaling appears to promote stability of  
471 morphologies once they have been adopted at specific phases of migration in mDA neurons.

472 In cortical neurons, Reelin appears to have multiple effects on cell morphology. In dissociated  
473 cortical neuronal cultures, Reelin signaling results in an increase in filopodia formation, likely via  
474 activation of Cdc42 *Leemhuis et al. (2010)*. Moreover, in presence of exogenous Reelin in organotypic  
475 slice cultures, projection neurons in the ventricular zone display a greater proportion of multipolar  
476 morphology, a phenotype concomitant with reduced migratory speeds (see above, *Britto et al.*  
477 *(2013)*). In contrast, LP morphology of migrating cortical neurons is comparable in presence and  
478 absence of Reelin signaling when these neurons first contact the marginal zone of the cortex, but  
479 Reelin signaling is required to maintain this morphology and a stable LP during the final somal  
480 translocation step of these neurons *Chai et al. (2016)*, *Franco et al. (2011)*. Finally, a recent study  
481 showing the phosphorylation of DAB1 via the Netrin receptor deleted in colorectal cancer (DCC) has  
482 reported an increase in multipolar neurons in the subventricular zone of *Dcc* knockout cortex *Zhang*  
483 *et al. (2018)*. In summary, depending on location, concentration, and sub-cellular localization, Reelin  
484 and DAB1 can have differing effects on the morphology of migrating neurons.

485 An indirect regulation of morphology by Reelin signaling has been reported in tangentially-  
486 migrating cortical interneurons. In interneurons, branching of LPs aids in precise sensing of the  
487 extracellular environment during chemotaxis *Martini et al. (2008)*. In the inverted *reeler* cortex,  
488 interneurons display a significantly higher number of branch nodes and higher length of LPs than  
489 interneurons in control brains *Yabut et al. (2007)*. This aberrant morphology is accompanied by

490 their ectopic location in cortical layers. Since interneurons do not directly require Reelin signaling  
491 for their migration, it is likely that their aberrant morphology in the *reeler* cortex is an indirect effect  
492 of their altered position. As we observe similar effects on cell morphology in *Dab1*<sup>-/-</sup> mDA neurons,  
493 the aberrant mDA neuronal morphology may be a consequence of an increased necessity to scan  
494 the environment for guidance cues in ectopic medial positions rather than a direct downstream  
495 effect of Reelin.

#### 496 **Reelin downstream signaling in SN-mDA neurons**

497 It has previously been demonstrated that the regulation of CDH2 via the Crk/CrkL-C3G-Rap1  
498 pathway at the cell surface is important for the effect of Reelin on the polarity of cortical pro-  
499 jection neurons during their migration *Franco et al. (2011)*, *Park and Curran (2008)*, *Sekine et al.*  
500 *(2012)*, *Voss et al. (2008)*. Cofilin1 has been shown to stabilize the LPs of migrating cortical neurons  
501 downstream of Reelin signaling-activated LIMK1 *Chai et al. (2016)*, *Chai et al. (2009)*. However,  
502 we demonstrate here that expression and/or phosphorylation levels of these Reelin downstream  
503 effectors are not obviously altered in mDA neurons in the absence of Reelin signaling. Other  
504 signaling events that influence cortical migration downstream or in parallel to Reelin signaling are  
505 mediated through integrin  $\alpha 5\beta 1$  or the Netrin1-DCC pathway. The knockdown of integrin  $\alpha 5\beta 1$   
506 in cortical neurons affects apical process stability during terminal translocation suggesting that  
507 additional adhesion molecules may be recruited by Reelin signaling *Sekine et al. (2012)*. In the  
508 cortex, both CDH2 and integrin  $\alpha 5\beta 1$  act downstream of Reelin, with integrin  $\alpha 5\beta 1$  anchoring  
509 the leading tip of terminally translocating neurons in the marginal zone and CDH2 regulating the  
510 subsequent cell movements *Sekine et al. (2014)*. Interestingly, integrin  $\alpha 5\beta 1$  has been shown to be  
511 important for stabilizing neurite extensions of mDA neurons in vitro. Whether it plays a general role  
512 in stabilizing neuronal processes in mDA neurons, including LPs, and in mDA migration has not been  
513 explored *Izumi et al. (2017)*. Recently, cross talk between Netrin1-DCC and Reelin-Dab1 pathways  
514 has been reported in migration of cortical projection neurons *Zhang et al. (2018)*. The Netrin1-DCC  
515 pathway is also important for proper localization of SN-mDA neurons during development *Li et al.*  
516 *(2014)*, *Xu et al. (2010)*. Though the effect on mDA distribution induced by *Dcc* inactivation dif-  
517 fers from the effect caused by *Dab1* inactivation, it is possible that effectors downstream of the  
518 Netrin1-DCC pathway, such as focal adhesion kinase may play a role in mediating Reelin signal in  
519 mDA neurons *Zhang et al. (2018)*.

#### 520 **Conclusion**

521 Here we provide a detailed characterization of the migratory modes and cellular morphologies  
522 underlying SN-mDA tangential migration to gain a detailed understanding of SN formation. We  
523 demonstrate that Reelin directly regulates lateral, tangential migration of mDA neurons by stabilizing  
524 the morphology of mDA neurons, by promoting lateral anisotropy in small, slow movements and by  
525 increasing the frequency of laterally-directed moderate-to-fast migration events that cover larger  
526 distances. We thus present new mechanistic insight into how Reelin signaling controls tangential  
527 migration and regulates the formation of the SN and open the door to further investigations of the  
528 molecular mechanisms of mDA migration.

## 529 **Methods and Materials**

### 530 **Mouse lines**

531 *Dab1*<sup>flox</sup> and *Dab1*<sup>del</sup> mice *Franco et al. (2011)* were obtained from Dr. Amparo Acker-Palmer,  
532 University of Frankfurt. *Dab1* CKO mice (genotype: *DAT*<sup>Cre/+</sup>, *Dab1*<sup>flox/del</sup>) were generated by  
533 crossing *Dab1*<sup>flox/flox</sup> mice with *DAT*<sup>Cre/+</sup>, *Dab1*<sup>+/-del</sup> mice *Ekstrand et al. (2007)*. *Dab1*<sup>del/+</sup> mice  
534 were used to generate complete knockouts of *Dab1* (*Dab1*<sup>-/-</sup>). *DAT*<sup>Cre/+</sup> mice were crossed with  
535 *ROSA*<sup>loxP-STOP-loxP-EYFP</sup> mice (*R26*<sup>EYFP</sup>) *Srinivas et al. (2001)* to analyse the timing and extent of  
536 recombination. Mosaic labelling of migrating mDA neurons was achieved by crossing *Shh*<sup>CreER</sup>  
537 mice *Harfe et al. (2004)* with *R26*<sup>EYFP</sup> mice. Day of vaginal plug was recorded as E0.5. Mice were  
538 housed in a controlled environment, with 12-hour light/night cycles and *ad libidum* availability of

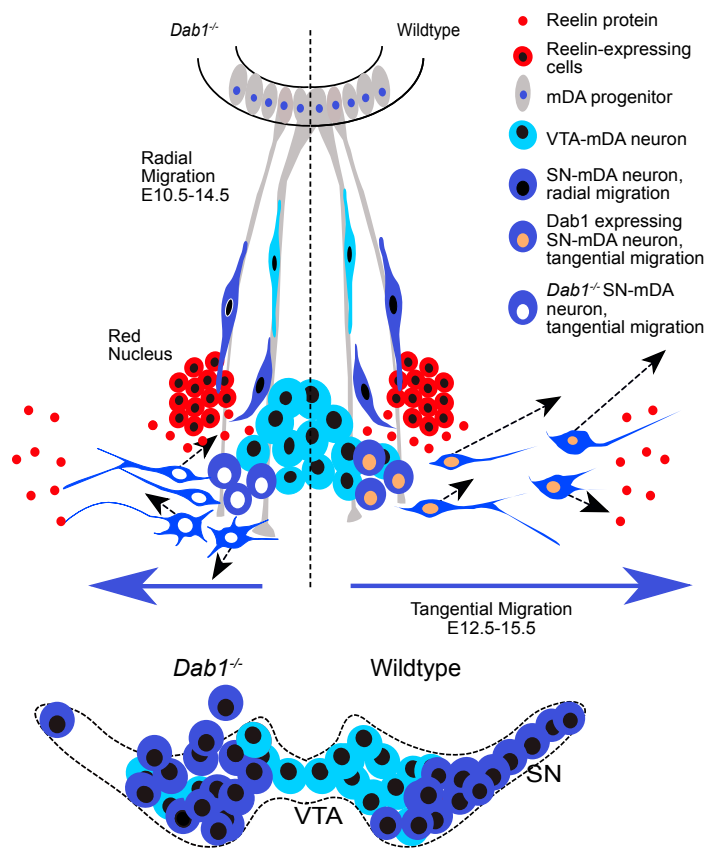

**Figure 11.** Schematic representation of Reelin regulation in mDA tangential migration. Reelin directly regulates lateral, tangential migration of mDA neurons and promotes fast, laterally directed mode of migration by regulating small lateral movements and stabilizing morphology of mDA neurons. In absence of Reelin signaling, slow movements in mDA neurons lose their lateral anisotropy, morphologies are less stable during migration and the fraction of neurons undergoing fast, laterally directed migration is reduced. This results in a medial clustering of SN-mDA neurons at late embryonic and postnatal stages.

539 food and water. All experiments were performed in compliance with the guidelines for the welfare  
 540 of animals issued by the Federal Government of Germany and the guidelines of the University of  
 541 Bonn.

#### 542 Tamoxifen

543 Tamoxifen (75 mg/kg body weight) was administered by gavage to pregnant dams at E8.5  
 544 to label SN-mDA neurons *Bodea et al. (2014)*. TM (Sigma Aldrich) was prepared as a 20 mg/mL  
 545 solution in corn oil (Sigma Aldrich), with addition of progesterone (Sigma Aldrich, 5 mg/mL) to  
 546 reduce miscarriages.

#### 547 Immunohistochemistry

548 Pregnant dams were sacrificed by cervical dislocation. Embryos were dissected in ice cold PBS.  
 549 Heads (E13.5 – E15.5) or brains (E16.5 – E18.5) were fixed in 4% paraformaldehyde (PFA) for 2 – 3 hrs  
 550 at room temperature (RT). Adult mice were anesthetized with isoflurane, perfused transcardially  
 551 with phosphate buffered saline (PBS), followed by 4% PFA. Tissue was cryopreserved in OCT Tissue  
 552 Tek (Sakura), embryonic tissue was cryosectioned at 14  $\mu$ m, adult brains were cryosectioned at  
 553 40  $\mu$ m thickness. Immunostaining was essentially performed as previously described *Blaess et al.*  
 554 (2011).

555 For immunostainings, sections were fixed briefly in 4%PFA (5 min at RT), followed by 1 hr  
 556 incubation in 10% NDS in 0.1% Triton in PBS (0.1% PBT). Sections were incubated overnight at 4°C in  
 557 primary antibody in 3% NDS in 0.1% PBT. Sections were washed 3X in 0.1%-PBT and incubated for 2  
 558 h in secondary antibody in 3% NDS in 0.1% PBT before mounting with Aqua Polymount (Polysciences

559 Inc.).

560 For the detection of SOX6, antigen retrieval was carried out in 0.1M EDTA for 30 min at 65°C  
561 before blocking, and Cy3-Streptavidin amplification was used with biotinylated donkey anti-rabbit  
562 antibody. To improve detection of DAB1 with rabbit anti-DAB1 antibody in E15.5 embryonic sections,  
563 a tyramide signal amplification (TSA) was carried out with the TSA kit (Perkin Elmer) as follows:  
564 Sections were blocked in the TSA kit blocking solution for 1 h followed by incubation with rabbit  
565 anti-DAB1 antibody (1:5000, *Howell et al. (1997)*) in 0.1% TBST (Tris buffered saline with 0.1% Triton)  
566 overnight at 4°C. After a washing step in TBST, sections were incubated for 2 h at RT with biotinylated  
567 donkey anti-rabbit in TBST, followed by another washing step and incubation with HRP conjugated  
568 Streptavidin (1: 1000) in TBST for 1 h at RT. Sections were again washed with TBST and incubated for  
569 10 min with TSA detection reagent. After additional washing steps in TBST and 0.1% PBT sections  
570 were co-stained for TH following the standard immunostaining protocol. A complete list of primary  
571 and secondary antibodies is presented in Table 2.

#### 572 **Immuno blotting**

573 WT and *Dab1*<sup>-/-</sup> embryos were prepped at E14.5. Ventral midbrain was isolated and snap-frozen  
574 in liquid nitrogen. Tissue extraction was performed with RIPA buffer (Sigma, R0278) supplemented  
575 with 1x Halt protease & phosphatase inhibitor (Thermofisher Scientific, 78442) on ice according  
576 to the manufacturer's instructions. Protein concentrations were determined by BCA assay (Ther-  
577 mofisher Scientific) using a BSA calibration curve. Protein supernatant was mixed with 4x LDS buffer  
578 and loaded on a 4-12% Bis Tris gel (NuPAGE, NP0335BOX). Protein was blotted on a PVDF membrane,  
579 blocked for 1 h at RT and incubated with primary antibody overnight. After washing with TBST,  
580 membrane was incubated with a corresponding horse radish peroxidase (HRP) coupled secondary  
581 antibody. Membrane was washed with TBST and visualization of immunoreactive proteins was  
582 conducted with a chemiluminescent HRP substrate solution (Super signal femto, Thermofisher  
583 Scientific/ Western HRP substrate, Merck Millipore) using a chemiluminescent imager (Chemidoc,  
584 Bio-Rad). Bound proteins were removed using 1x Western blot stripping buffer (2% SDS, 60,02 mM  
585 Tris (pH 6.8), 100 mM β-mercaptoethanol) and immunodetection was repeated. For quantification,  
586 densitometric analysis was performed, normalization was carried out with total protein (Amido  
587 Black, Sigma Aldrich) using the software Image Lab (Bio-Rad).

#### 588 **In situ hybridization**

589 Sections were post-fixed in 4% PFA for 10 min, rinsed in PBS and acetylated in 0.1 M TEA  
590 (triethanolamine)-HCl with 125 μL acetic anhydride for 5 min with stirring. Sections were washed in  
591 PBS and briefly dehydrated in 70%, 95% and 100% ethanol (EtOH). 1 μg of RNA probe was added to 1  
592 mL hybridization buffer and incubated for 2 min at 80°C. Sections were air-dried and transferred to  
593 a humidified hybridization cassette. A 1:1 mixture of formamide and H2O was used as humidifying  
594 solution. 300 μL hybridization solution containing RNA probe was added to each slide, slides  
595 were covered with RNase-free coverslips and incubated at 55°C overnight. On the following day,  
596 coverslips were removed in prewarmed 5X SSC. To reduce unspecific hybridization, sections were  
597 incubated in a 1:1 solution of formamide and 2X SSC (high stringency wash solution) for 30 min at  
598 65°C. Sections were then washed with RNase buffer, containing 0.1% RNase A at 37°C for 10 min  
599 to remove non-hybridized RNA. Sections were washed twice with high stringency solution for 20  
600 min at 65°C, once with 2X SSC and once with 0.1X SSC for 15 min at 37°C. Sections were placed in  
601 a humidified chamber and incubated with 10 % normal goat serum in 0.1% PBS-Tween (blocking  
602 solution) for 1 hour at RT. Sections were incubated with anti-DIG-AP Fab fragments (diluted 1:5000 in  
603 1% goat serum in 0.1% PBS-Tween) for 3 h at RT, or overnight at 4°C. Sections were washed several  
604 times 0.1% PBS-Tween, followed by two washes in NTMT buffer (containing 1 mg/mL levamisole to  
605 reduce background of endogenous alkaline phosphatase activity) for 10 min at RT. Sections were  
606 incubated in BM purple, a substrate for alkaline phosphatase (with 0.5 mg/mL levamisole) at RT  
607 until signal was observed. The chromogenic reaction was stopped by a 10 min incubation in TE  
608 buffer at RT. Sections were then washed in PBS, and immunostained for TH.

#### 609 **Image acquisition of fixed cryosections**

**Table 2.** Antibodies used for immunohistochemistry and western blots

| <b>Immunohistochemistry: Primary antibodies (made in donkey)</b>   |                                            |                   |
|--------------------------------------------------------------------|--------------------------------------------|-------------------|
| Antibody                                                           | Manufacturer                               | Concentration     |
| rabbit anti-TH                                                     | AB152 Merck                                | 1:500             |
| mouse anti-TH                                                      | MAB318 Merck                               | 1:500             |
| rabbit anti-Girk2                                                  | APC006 Alamone Labs                        | 1:400             |
| rabbit anti-Calbindin                                              | C9848 Swant                                | 1: 5000           |
| rabbit anti-GFP                                                    | A11122 Life Technologies                   | 1: 400            |
| rat anti-GFP                                                       | 04404-84 Nalacai                           | 1: 1500           |
| goat anti-Reelin                                                   | AF3820 R&D systems                         | 1: 50             |
| rabbit anti-Dab1                                                   | kindly provided by Dr. Brian Howell        | 1: 5000 (TSA kit) |
| goat anti-Otx2                                                     | GT15095 Neuromics                          | 1: 5000           |
| rabbit anti-Sox6                                                   | ab30455 Abcam                              | 1: 500            |
| rabbit anti-N-Cadherin                                             | ab18203 Abcam                              | 1: 250            |
| <b>Immunohistochemistry: Secondary antibodies (made in donkey)</b> |                                            |                   |
| anti-rabbit Alexa 488                                              | A21206 Invitrogen                          | 1: 500            |
| anti-rabbit Alexa 350                                              | A10039 Invitrogen                          | 1: 500            |
| anti-mouse Alexa 488                                               | A21202 Invitrogen                          | 1: 500            |
| anti-rat Alexa 488                                                 | A21208 Molecular probes                    | 1: 500            |
| anti-goat Alexa 488                                                | 705-545-147 Jackson ImmunoResearch         | 1: 500            |
| anti-rabbit Cy3                                                    | 711-165-152 Jackson ImmunoResearch         | 1: 200            |
| anti-mouse Cy3                                                     | 715-165-150 Jackson ImmunoResearch         | 1: 200            |
| anti-goat Cy3                                                      | 705-165-147 Jackson ImmunoResearch         | 1: 200            |
| biotinylated donkey anti-rabbit                                    | 711-065-152 Jackson ImmunoResearch         | 1: 200            |
| <b>Western blot</b>                                                |                                            |                   |
| rabbit anti-cofilin                                                | Kindly provided by Dr. Prof. Walter Wittke | 1:5000            |
| rabbit anti-p-Cofilin (ser3) (77G2)                                | #3313 Cell signaling                       | 1:1000            |
| rabbit anti-p-Limk1 (Thr508) /Limk2 (thr505)                       | #3841 Cell signaling                       | 1:500             |
| Rabbit anti-Limk1                                                  | #3842 Cell signaling                       | 1:1000            |
| Rabbit anti-N-cadherin                                             | Abcam ab18203                              | 1: 500            |
| Rb-HRP                                                             | #7074 Cell signaling                       | 1:1000            |

610 Embryonic and adult sections were imaged at an inverted Zeiss AxioObserver Z1 microscope  
 611 equipped with an ApoTome. Fluorescence images were acquired with Zeiss AxioCam MRm 1388 x  
 612 1040 pixels (Carl Zeiss). At 10X (EC PlnN 10x/0.3, Carl Zeiss) and 20X (EC PlnN 20x/0.5, Carl Zeiss)  
 613 magnifications, tile images were acquired with conventional epifluorescence. ApoTome function  
 614 was used to acquire tile images and z-stacks at 40X (Pln Apo 40x/1.3 Oil, Carl Zeiss) and 63X (Pln  
 615 Apo 63x/1.4 Oil, Carl Zeiss) magnifications. *In situ* hybridized sections were imaged with trans-  
 616 illumination (AxioCam MRc, 1300 x 1030 pixels, Carl Zeiss) at the AxioObserver Z1 setup. Images

617 were stitched with Zen blue software (Zeiss, 2012). Sections stained with Alexa 649 secondary  
618 antibody, and 63X confocal images were imaged at a Leica SP8 confocal microscope and stitched  
619 with Leica PC suite (Leica, 2014)

### 620 **Organotypic slice culture and time lapse imaging**

621 Organotypic slice cultures were generated as previously described *Bodea and Blaess (2012)*.  
622 Slices were placed on Millicell membrane inserts (Merck) and incubated for 6-12 h at 37°C, 5% CO<sub>2</sub>,  
623 before imaging. Slices were briefly examined at a Zeiss Axiobserver microscope with conventional  
624 epifluorescence. Healthy slices, with well-defined, strongly fluorescent cells, were chosen for two-  
625 photon excitation imaging. Slices on their membrane inserts were transferred to  $\mu$ -Dish imaging  
626 dishes (Ibidi) containing 750  $\mu$ L of prewarmed, fresh culture medium (5 mL Hank's balanced salt so-  
627 lution, 9 mL DMEM high glucose (Sigma Aldrich), 5 mL horse serum, 200  $\mu$ L Penicillin/Streptomycin  
628 for 20 mL of culture medium). Slices were imaged at 32X magnification (C-Achroplan 32x/0.85,  
629 Carl Zeiss) with an inverted, two-photon Zeiss LSM 710 NLO microscope, equipped with temper-  
630 ature and CO<sub>2</sub> control (Pecon). The microscope setup and the 32X water immersion objective  
631 were preheated for 8 hours before time-lapse experiments. Images were acquired using 920  
632 nm for excitation with a laser power of 5 - 10% (Laser: Chameleon Ultrall, Coherent). A total  
633 of 3 control (*Shh<sup>CreER/+</sup>, Rosa26<sup>lox-stop-loxYFP/+</sup>, Dab<sup>+/+</sup>* or *Shh<sup>CreER/+</sup>, Rosa26<sup>lox-stop-loxYFP/+</sup>, Dab1<sup>del/+</sup>*)  
634 and *Dab1<sup>-/-</sup>* slices (*Shh<sup>CreER/+</sup>, Rosa26<sup>lox-stop-loxYFP/+</sup>, Dab1<sup>del/del</sup>*), across 4 litters, were imaged as  
635 described. Of the 6 slices analyzed, 3 control and 2 *Dab1<sup>-/-</sup>* were imaged for 4.3 hours while one  
636 *Dab1<sup>-/-</sup>* slice was imaged for 2.6 hours. All imaged slices were post-stained with TH to confirm  
637 that the region imaged was within the dopaminergic domain *Bodea et al. (2014)*. Organotypic slice  
638 cultures were fixed in 4% PFA for 1 h at RT, then rinsed in PBS and 0.3 % PBT for 10 min. Slices  
639 were incubated in blocking solution (10% NDS in 0.3% PBT) at RT for 2 h, or overnight at 4°C. After  
640 blocking, slices were incubated with primary antibody solution (3% NDS in 0.3% PBT) for 24 - 48 h at  
641 4°C. The following primary antibodies and dilutions were used: rabbit anti-TH (1:500), rat anti-GFP  
642 (1:1000). Slices were washed in 0.3% PBT and then incubated in secondary antibody solution (3%  
643 NDS in 0.3% PBT), at RT for 4 h, or overnight at 4°C. Secondary antibodies donkey anti-rabbit Cy3  
644 (1:200) and donkey anti-rat Alexa 488 (1:500) were used. All steps were carried out in a 6-well plate.

### 645 **Immunostaining and clearing of whole mount embryonic brains**

646 Brains from E13.5 embryos were fixed in 4% PFA for 4 h at room temperature, or overnight at 4°C.  
647 Brains were washed with PBS, 0.3% PBT, and incubated with blocking solution (10%NDS in 0.3%  
648 PBT) overnight at 4°C. The brains were incubated with primary antibodies: rabbit anti-TH (1:500)  
649 and rat anti-GFP (1:1000) at 4°C for 2 days. Next, the primary antibody solution was removed and  
650 the brains were washed three times with 0.3% PBT at RT for 15 min. The tissue was incubated with  
651 secondary antibodies: donkey anti-rat IgG-DyLight 647 (1:100) and donkey anti-rabbit Cy3 (1:200) at  
652 RT for 1 day. Subsequently, the tissue was washed three times with 0.3% PBT and three times with  
653 PBS for 20 min. All washing steps and antibody solutions preparation were performed using 0.3 %  
654 PBT. All steps were carried out in 24-well plates.

655 Tissue clearing was carried out as described previously *Schwarz et al. (2015)*. The procedure was  
656 modified for embryonic tissue as described here: After immunostaining, brains were incubated  
657 in increasing concentrations (30%, 50%, 70%) of tert-butanol (pH 9.5) for 4 h at RT followed by  
658 96% and 100% tert-butanol (pH 9.5) for 4 h at 33°C. Brains were then incubated overnight in a  
659 triethylamine pH-adjusted 1:1 mixture of benzyl alcohol/benzyl benzoate (BABB, pH 9.5) at 33°C.  
660 Brains were stored in clearing solution at 4°C and imaged within 1 week of clearing. Whole mount  
661 brains were imaged in clearing solution with a 20X BABB dipping objective (Olympus) at a Leica  
662 SP8 upright microscope. Multi-channel image acquisition of the whole brain (4-6 tiles, 150 - 200  
663 z-steps, step-size = 1.5  $\mu$ m) took 30 - 70 h, and resulted in multichannel datasets of large sizes (20 -  
664 80 GB). Voxel size of thus acquired images was 0.432  $\mu$ m X 0.432  $\mu$ m X 1.5  $\mu$ m. Individual tiles at  
665 each z-step were stitched together using the Leica SP8 PC suite (Leica, 2014).

### 666 **Analysis of cell distribution in fixed slices**

667 Mediolateral distribution of mDA neurons was analyzed for n>3 animals at each time point of

668 analysis (E15.5, E18.5 and P21-30) by constructing normalized bins spanning the entire TH-positive  
669 domain. Since we observed that in both, *Dab1* CKO and *Dab1*<sup>-/-</sup> mice, a few TH-positive cells of the  
670 lateral most SN lateralis were consistently present (yellow arrowheads (Figure 1D,E,H,I)), we defined  
671 the mediolateral bins by quadrisectioning a line extending from the midline to the lateral most TH  
672 positive cells (Figure 1B). The fraction of the total number of TH positive cells in each mediolateral  
673 bin was evaluated for control, *Dab1* CKO and *Dab1*<sup>-/-</sup> brains.

#### 674 **Speed and trajectories of migrating mDA neurons**

675 To prevent any bias in selection of cells for tracking, and to track a large number of neurons  
676 in 3D in our two-photon time lapse datasets, we used the semi-automatic plugin TrackMate in  
677 Fiji *Tinevez et al. (2017)*. Before soma detection, a 3X3 median filter was applied by the TrackMate  
678 plugin, to reduce salt and pepper background noise. Soma detection was carried out using the  
679 Laplacian of Gaussian (LoG) detector in TrackMate. The soma detected by the TrackMate plugin  
680 were automatically linked across time, in 3D, by using the linear assignment problem (LAP) tracker in  
681 TrackMate *Tinevez et al. (2017)*; *Jaqaman et al. (2008)*. After automatic tracking, the track scheme  
682 view in TrackMate was used to check the accuracy of each track by eye. Spurious tracks were deleted  
683 and missed detections were added using the manual tracking mode in TrackMate. Excel files from  
684 the TrackMate plugin were imported into MatLab *Wu et al. (2015)*. 3D soma velocity was obtained  
685 at every time point (in units of  $\mu\text{m/hr}$ ) of the analysis (starting  $t = 10$  min) as the change in soma  
686 position vector between the previous frame and the current frame, divided by the time duration  
687 (0.167 hr) between frames (code modified from *Wu et al. (2015)*). This data was used to generate  
688 probability histograms for average soma speed, maximum soma speed, time spent at rest (defined  
689 as soma speed  $< 10 \mu\text{m/hr}$ ), time spent in slow migration (soma speed between 10 and 30  $\mu\text{m/hr}$ ),  
690 time spent in medium-fast migration (30-60  $\mu\text{m/hr}$ ) and time spent in fast migration (soma speed  $>$   
691 60  $\mu\text{m/hr}$ ). Categories for rest, slow, medium-fast and fast speeds were defined for the purpose of  
692 easy visualization of data, and were based on 25% percentile (10  $\mu\text{m/hr}$ ) and 75% percentile speeds  
693 (30  $\mu\text{m/hr}$ ) of *Dab1*<sup>-/-</sup> population.

694 Cell trajectory angles were measured in 2D as the angle between midline (positive y-axis in the  
695 image) and the line joining the first and final soma positions. Cells that moved with maximum  
696 speeds of less than 10  $\mu\text{m/hr}$  were excluded from the trajectory analysis as they were categorized as  
697 being at rest. Statistics on trajectory angles were performed with CircStat: a MatLab toolbox *Berens*  
698 *(2009)*.

699 Only cells for which the soma were detected at all time points of imaging were included in  
700 the analysis. Using this approach, we tracked 806 cells in slices from control mice (*Shh*<sup>CreER/+</sup>,  
701 *Rosa26*<sup>lox-stop-loxYFP/+</sup>, *Dab1*<sup>+/+</sup> or *Shh*<sup>CreER/+</sup>, *Rosa26*<sup>lox-stop-loxYFP/+</sup>, *Dab1*<sup>-/+</sup>) and 844 cells from *Dab1*<sup>-/-</sup>  
702 mice (*Shh*<sup>CreER/+</sup>, *Rosa26*<sup>lox-stop-loxYFP/+</sup>, *Dab1*<sup>-/-</sup>), across 3 slices and acquired their speed and trajec-  
703 tory profiles. Each cell (and track) had a unique ID assigned by the TrackMate plugin. These cell IDs  
704 were used to identify and locate individual cells in the slice for further analysis.

#### 705 **Morphology analysis of migrating mDA neurons**

706 We restricted our morphological analysis to  $n = 150$  control (70 fast, 40 medium-fast and 40 slow  
707 cells), and 129 *Dab1*<sup>-/-</sup> (49 fast, 40 medium-fast and 40 slow) cells. We observed that *Dab1*<sup>-/-</sup> cells  
708 continuously extended neurites in slices and this made it difficult to unambiguously assign processes  
709 to individual cells as imaging progressed. Hence, we examined the morphology of each cell, in 3D, for  
710 the first 18 frames of imaging. Cell soma was defined as the spot detected/assigned to the cells in the  
711 TrackMate plugin. Analysis was done manually, by rendering individual neurons in 4D (3D projection  
712 over all time frames) in ImageJ, and recording the number of primary processes (arising from the  
713 soma) and secondary processes at each time point. A cell was defined as bipolar when fewer than  
714 two processes were observed arising directly from the soma. The appearance/ disappearance of  
715 any branch was regarded as a branch transition. At each time point, the morphology of the cell,  
716 and the number of branch transitions, was manually annotated to the spot position data of the cell  
717 in excel sheets exported from TrackMate. In addition, 20 control and *Dab1*<sup>-/-</sup> cells were randomly  
718 chosen for tracing in 3D. These neurons were traced manually in simple neurite tracer (SNT) plugin



719 of Fiji *Longair et al. (2011)*. Tracings were carried out, at each time point individually, for the first 18  
720 frames of imaging. Fills of traced neurons were generated semi-automatically in the SNT plugin.  
721 Fill thickness was decided by eye but was maintained across all time points for a cell. Maximum  
722 intensity projections were also generated for the 3D segmentation fills. SNT traces were also used  
723 to measure length of the leading process in 3D.

#### 724 **Statistical analysis**

725 Statistical significance of mediolateral distributions of TH<sup>+</sup> mDA neurons in control, *Dab1* CKO  
726 and *Dab1*<sup>-/-</sup> adult and embryonic brains were assessed by two-way ANOVA with Tukey's correction  
727 for multiple comparisons (n =6 animals/ genotype, at P30 and n = 4 animals/ genotype at E18.5). At  
728 E15.5, mediolateral distribution of TH<sup>+</sup> mDA neurons and P30 TH<sup>+</sup> GIRK2<sup>+</sup> mediolateral distributions  
729 in control and *Dab1* CKO brains were assessed for statistical significance by Student's t-test. All  
730 non-parametric distributions were analyzed with Mann-Whitney's non-parametric rank test, Kruskal-  
731 Wallis test or Kalmogrov-Smirnov test (mentioned in figure legends) in Prism 7/ MatLab. Circular  
732 variables were analyzed with the CircStat toolbox for MatLab. Angle distribution in populations  
733 were compared using Kuiper's test for circular variables *Berens (2009)* .

#### 734 **Acknowledgements**

735 This work was supported by the Maria von Linden-Program and BONFOR (both University of Bonn,  
736 to S.B.), the German Research Foundation (BL 767/2-1, BL 767/3-1 to S.B.), a German Academic  
737 Exchange Service doctoral fellowship (to A.R.V) and a European Union grant (FP7-HEALTH-F4-2013-  
738 602278-Neurostemcellrepair to O.B.). We thank Brian Howell for providing the *Dab1* antibody;  
739 Walter Witke for providing the Cofilin1 antibody, Nils-Görran Larsson for the *DAT*<sup>Cre</sup> mouse line;  
740 Ulrich Müller for providing the *Dab1*<sup>del</sup> and *Dab1*<sup>fllox</sup> mouse lines; Donato Di Monte and Michael  
741 Helwig for assistance with two-photon imaging; Jonas Doerr, Martin Schwarz and Anke Leinhaas for  
742 initial support with clearing and imaging of whole-mount brains; Petra Mocellin for initial support  
743 with image analysis; Killian Berendes for technical support; Gabriela Bodea, David Greenberg and  
744 Marianna Tolve for critical reading of the manuscript. The authors declare no competing financial  
745 or non-financial interests.

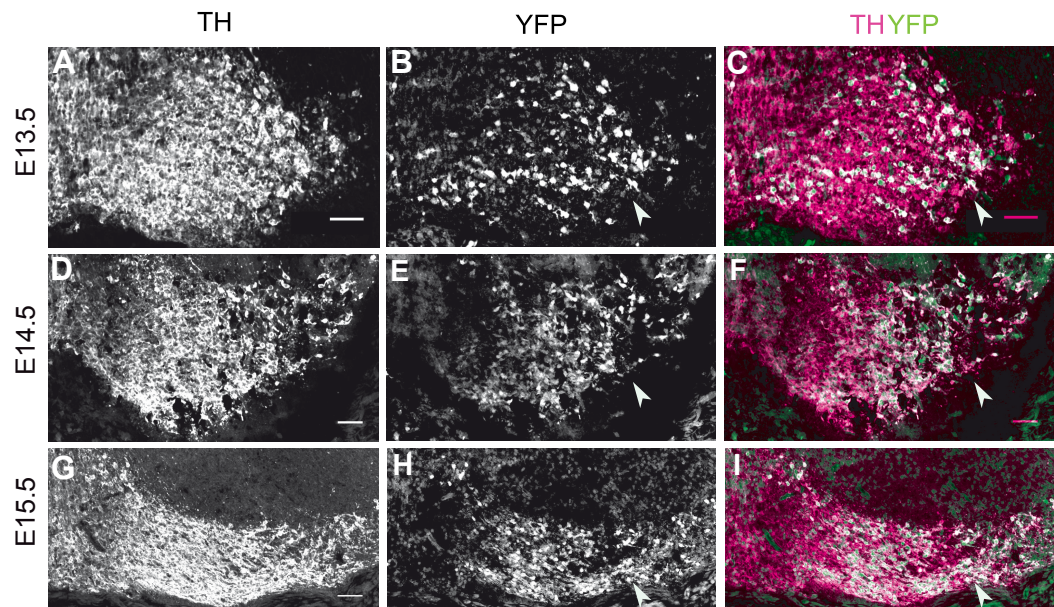

**Figure 1- figure supplement 1: *Dat<sup>Cre</sup>* mediated recombination pattern.** (A-C) Analysis of Cre-mediated recombination in *DAT<sup>Cre/+</sup>, Rosa26<sup>EYFP/+</sup>* mice. Immunostaining for TH and YFP at E13.5 shows Cre-mediated recombination in the lateral mDA regions (white arrowhead). (D-F) Immunostaining for TH and YFP at E14.5 shows almost complete recombination in mDA neurons of the SN (white arrowhead). (G-I) By E15.5, TH<sup>+</sup> mDA neurons of the SN and lateral VTA are YFP<sup>+</sup> (white arrowhead). Scale bar: 50  $\mu$ m.

746

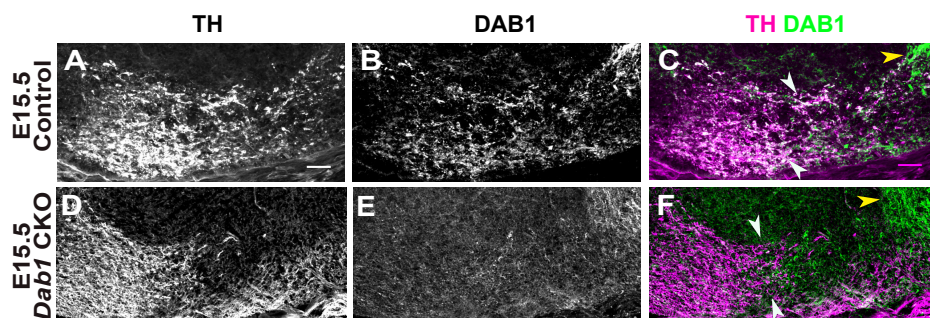

**Figure 1- Figure supplement 2. Specific loss of DAB1 protein in mDA neurons of *Dab1* CKO brains.** (A-C) Analysis of DAB1 protein expression in control mice at E15.5: Immunostaining for TH and DAB1 at E15.5 shows DAB1 expression in TH<sup>+</sup> neurons of the SN and lateral VTA (white arrowheads) and in non-dopaminergic regions lateral to mDA neurons (yellow arrowhead). (D-F) Analysis of DAB1 expression in *Dab1* CKO mice at E15.5 shows absence of DAB1 expression in TH<sup>+</sup> mDA neurons (white arrowheads), while DAB1 expression persists in lateral non-dopaminergic regions (yellow arrowhead). Scale bar: 50  $\mu$ m.

748

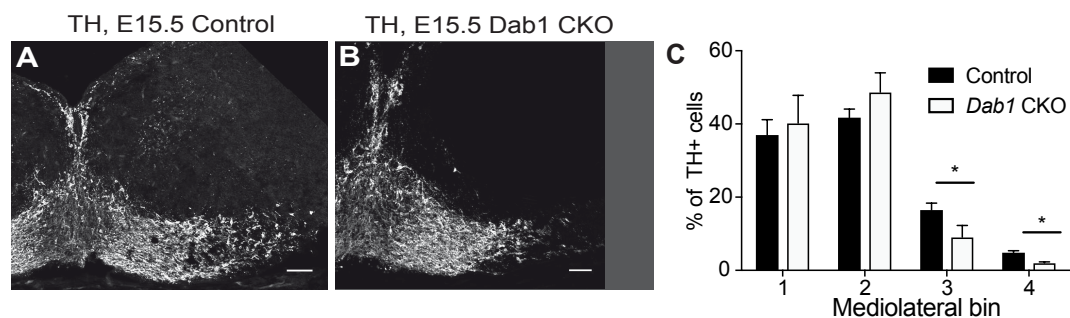

**Figure 1- Figure supplement 3. Mediolateral distribution of mDA neurons at E15.5 in absence of Reelin signaling.** Analysis of mediolateral distribution of TH<sup>+</sup> cells in control (A) and *Dab1* CKO mice (B) at E15.5 shows a medial accumulation of cells in *Dab1* CKO mice (C). Data are represented as mean + s.e.m for n=3 brains. \* indicates p<0.05 by Student's t-test corrected for multiple comparisons (Holm-Sidak method). Scale bars: 50  $\mu$ m.

749

750

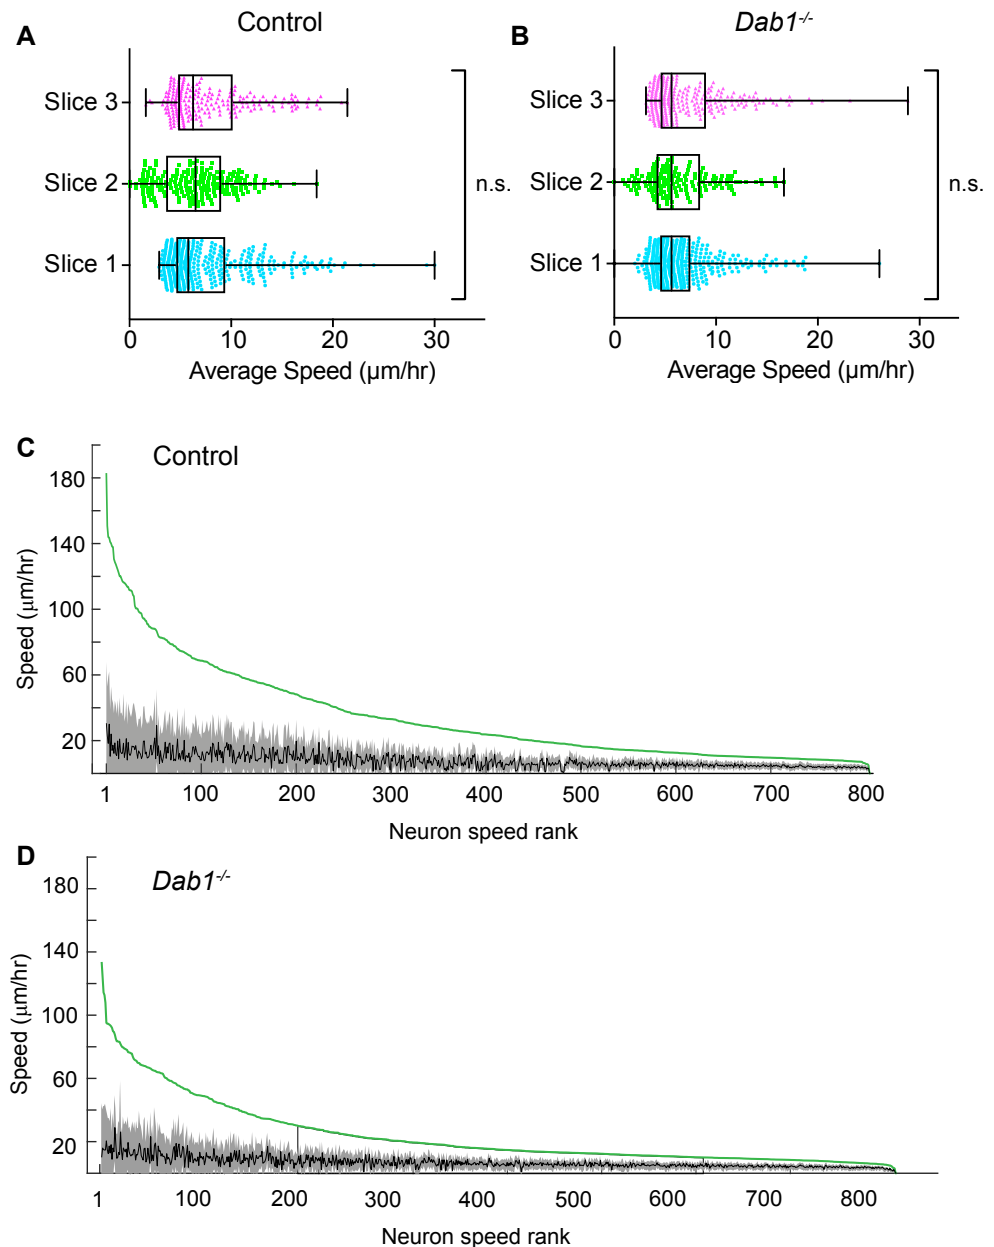

**Figure 4- Figure supplement 1. Average speed distributions and speed profiles of SN-mDA neurons.** (A) Average speed distributions across 3 control slices are not significantly different ( $p = 0.1065$ , Kruskal-Wallis test for non-parametric distributions). (C) Average speed distributions across 3 *Dab1*<sup>-/-</sup> slices are not significantly different ( $p = 0.2279$ , Kruskal-Wallis test for non-parametric distributions). (C,D) To demonstrate the extent of max-speed variation in control and *Dab1*<sup>-/-</sup> mDA neurons from their mean speeds, each neuron in the dataset was ranked by its max-speed (green curve for the population). For each neuron, the mean and standard deviation around the mean were also plotted: grey and black curves represent variation of soma speed (grey) around average speed (black) for all mDA neurons in the dataset.

751

752

753

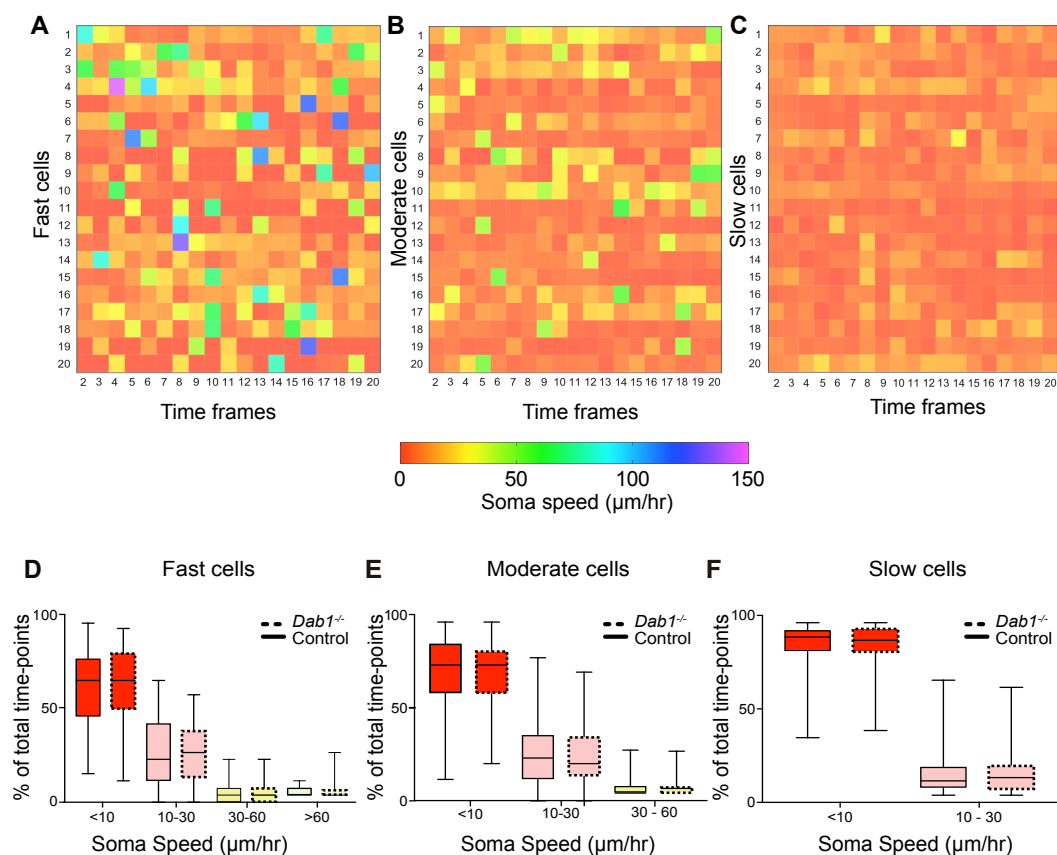

**Figure 5 – Figure supplement 1. Variation in instantaneous soma speed of mDA neurons.** (A-C) Instantaneous soma speeds of 20 fast, moderate or slow cells in control slices as a heat map across 20 consecutive time frames. Each cell is one row in the heat-map, each column is a time frame. Soma speeds range from 0 – 150  $\mu\text{m/hr}$ . (D-F) Individual fast, moderate and slow cells spend comparable periods of time in fast, moderate, slow and rest phases of migration in *Dab1*<sup>-/-</sup> slices compared to control slices.

754

755

756

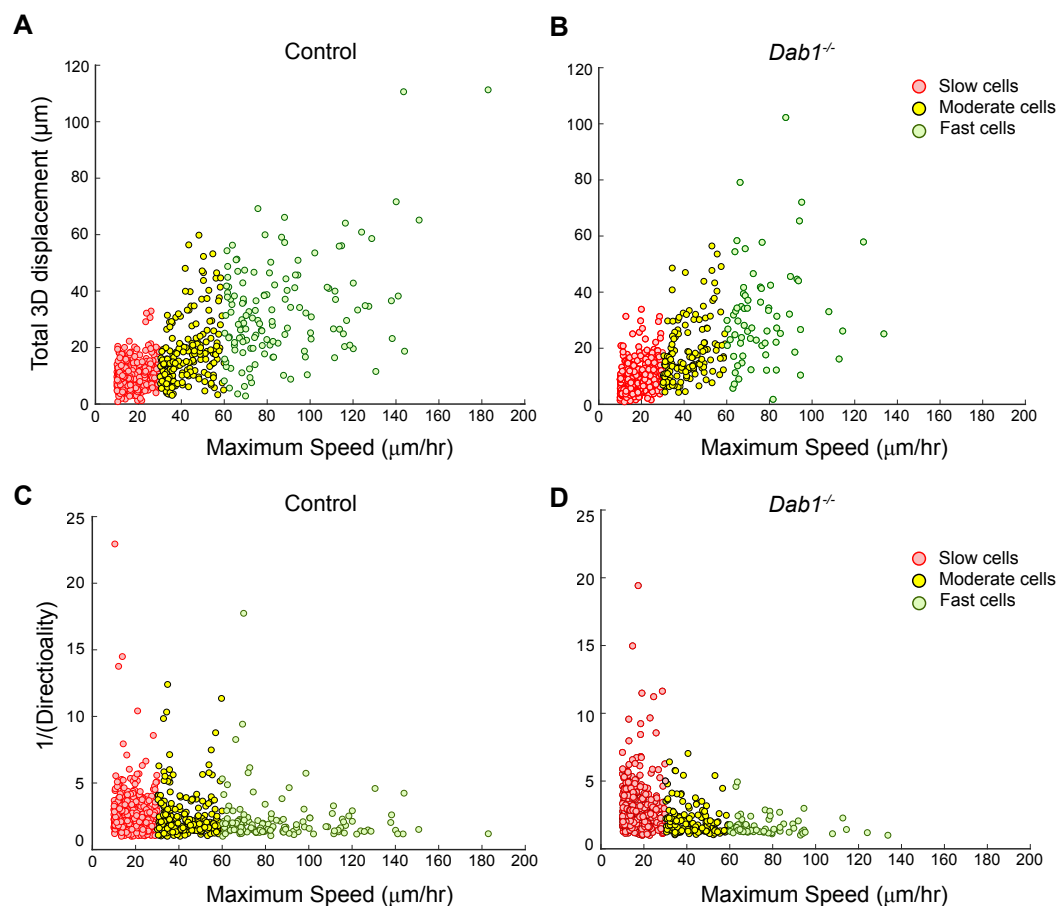

**Figure 5- Figure supplement 2. Individual fast, moderate and slow mDA neurons from *Dab1*<sup>-/-</sup> slices have similar directionality and displacement profiles as mDA neurons in control slices.** (A,B) Total displacement (3D) increases with increasing max-speed of mDA neurons in control and *Dab1*<sup>-/-</sup> slices. (C,D) Directionality of mDA neurons increases with increasing max-speed in control and *Dab1*<sup>-/-</sup> slices. Note that inverse values of directionality are plotted against the max-speeds of migratory mDA neurons.

757

758

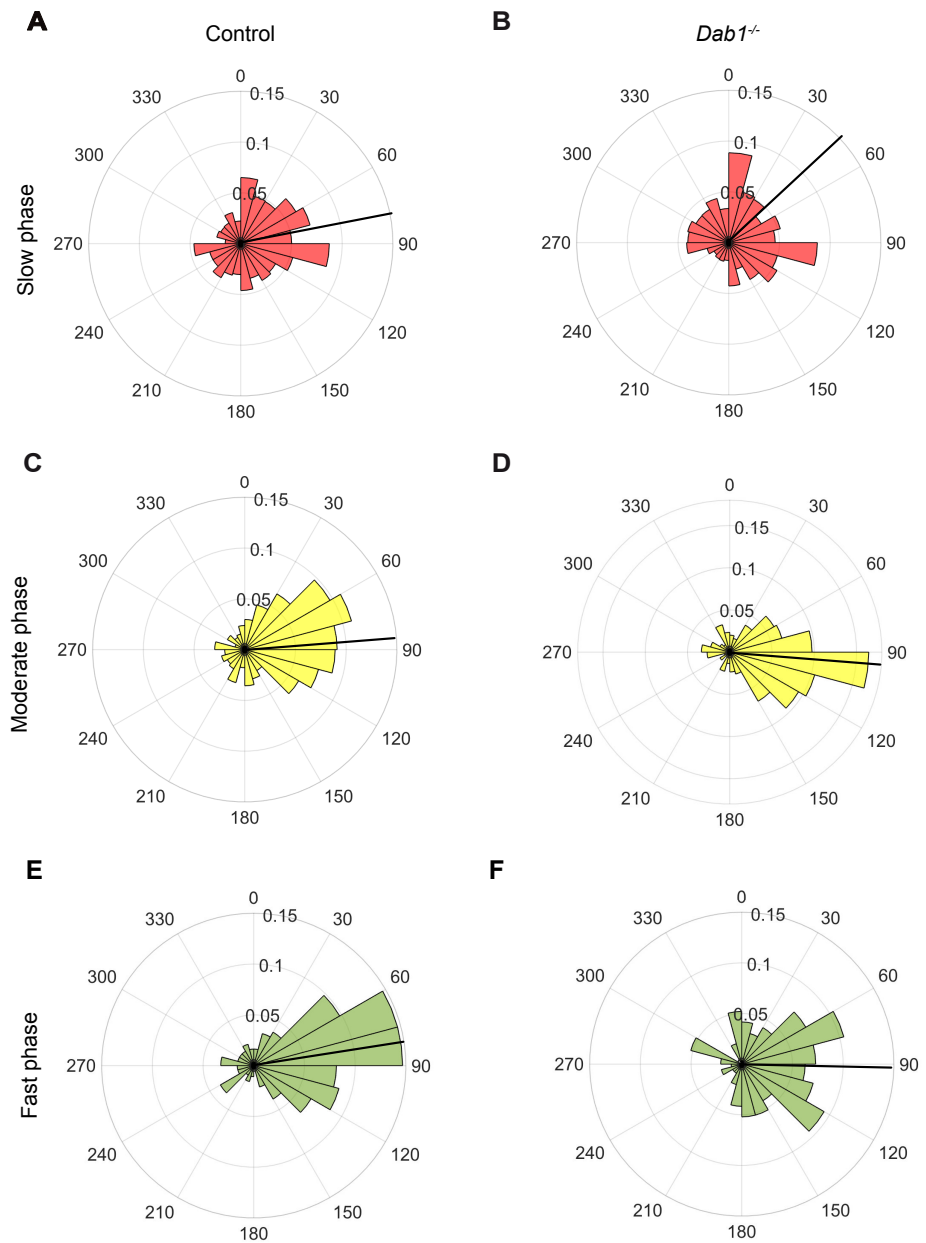

**Figure 7 – Figure supplement 1. Lateral migration occurs predominantly during moderate and fast migratory phases of mDA neurons.** (A,B) Polar histogram for angle of slow mDA trajectories to the midline shows that slow migratory movements have the least preference for lateral migratory direction in both control (A) and *Dab1*<sup>-/-</sup> (B) slices (n = 3506 movements in control, n = 2622 movements in *Dab1*<sup>-/-</sup> mDA neurons). (C-F) Moderate (C,D; n = 506 movements in control, n = 298 movements in *Dab1*<sup>-/-</sup> mDA neurons) and fast movements (E,F; n = 184 movements in control, n = 96 movements in *Dab1*<sup>-/-</sup> mDA neurons) are laterally directed and comparable in control and *Dab1*<sup>-/-</sup> slices. Red (A,B), black (C,D) and green (E,F) lines represent mean angular direction for slow, moderate and fast populations, respectively.

759



760

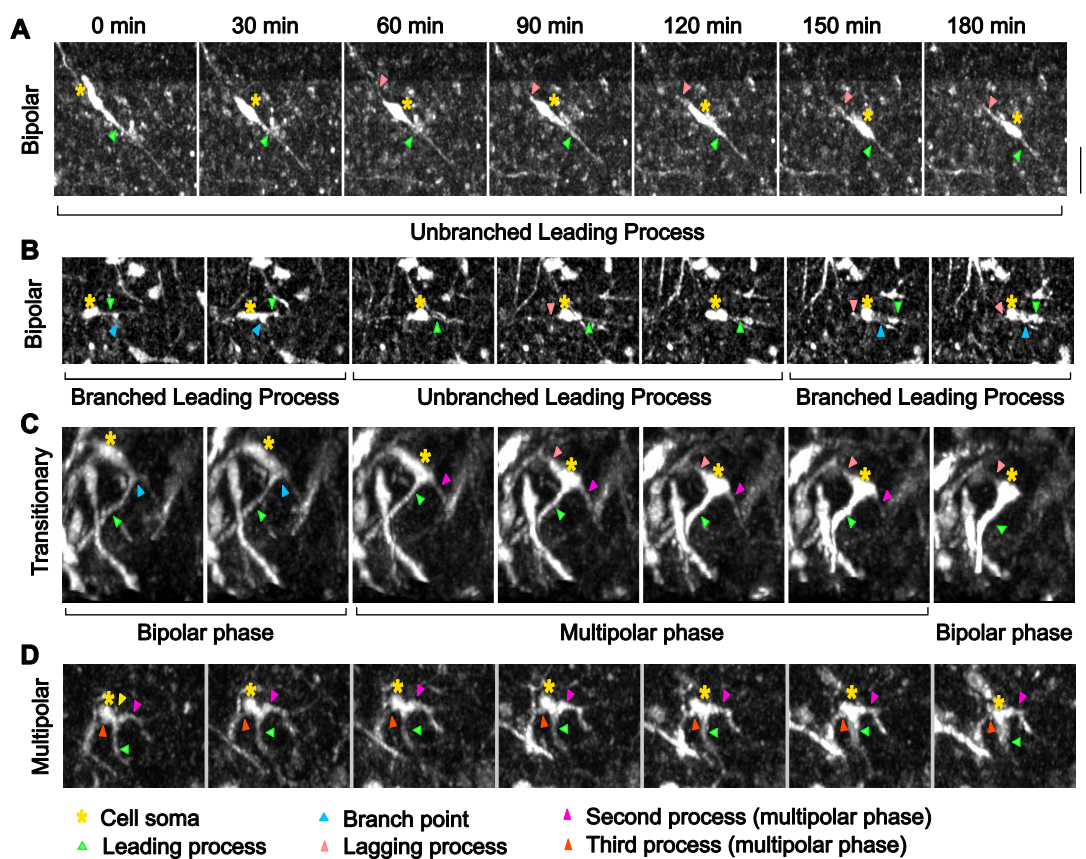

**Figure 8 - Figure supplement 1. Morphological characterization of mDA neurons.** (A) Control bipolar mDA neuron displaying bipolar-unbranched morphology at all analyzed time-points. (B) Bipolar mDA neuron that switches between a branched and unbranched leading process. (C) Transitional mDA neuron that switches between bipolar and multipolar phases twice in the duration of analysis. (D) mDA neuron that remains multipolar during the entire duration of analysis.

761

762

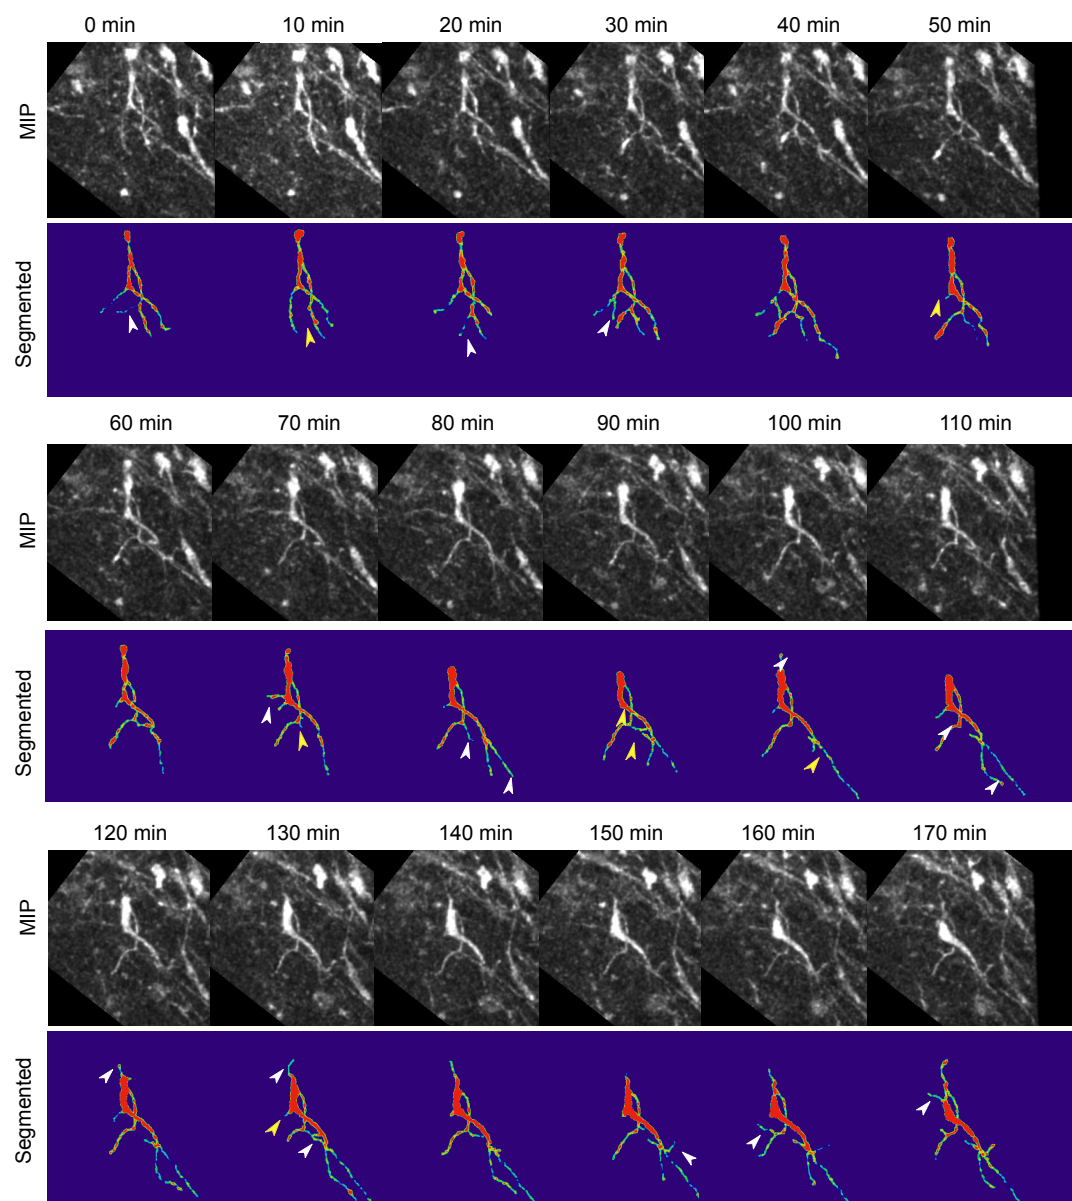

Figure 9 - Figure supplement 1. Absence of Reelin signaling results in the formation of unstable protrusions on the soma and leading process of mDA neurons. Maximum intensity projections of cell shown in Figure 8 for each time point of the analysis. Cell in (A-C) is color-coded for the intensity of YFP in images (Physics LUT in Fiji). Red represents bright structures, green-blue represents weakly labelled structures. White arrowheads indicate appearance of a branch/protrusion, yellow arrowheads indicate disappearance. Scale bar: 25 $\mu$ m.

763

764

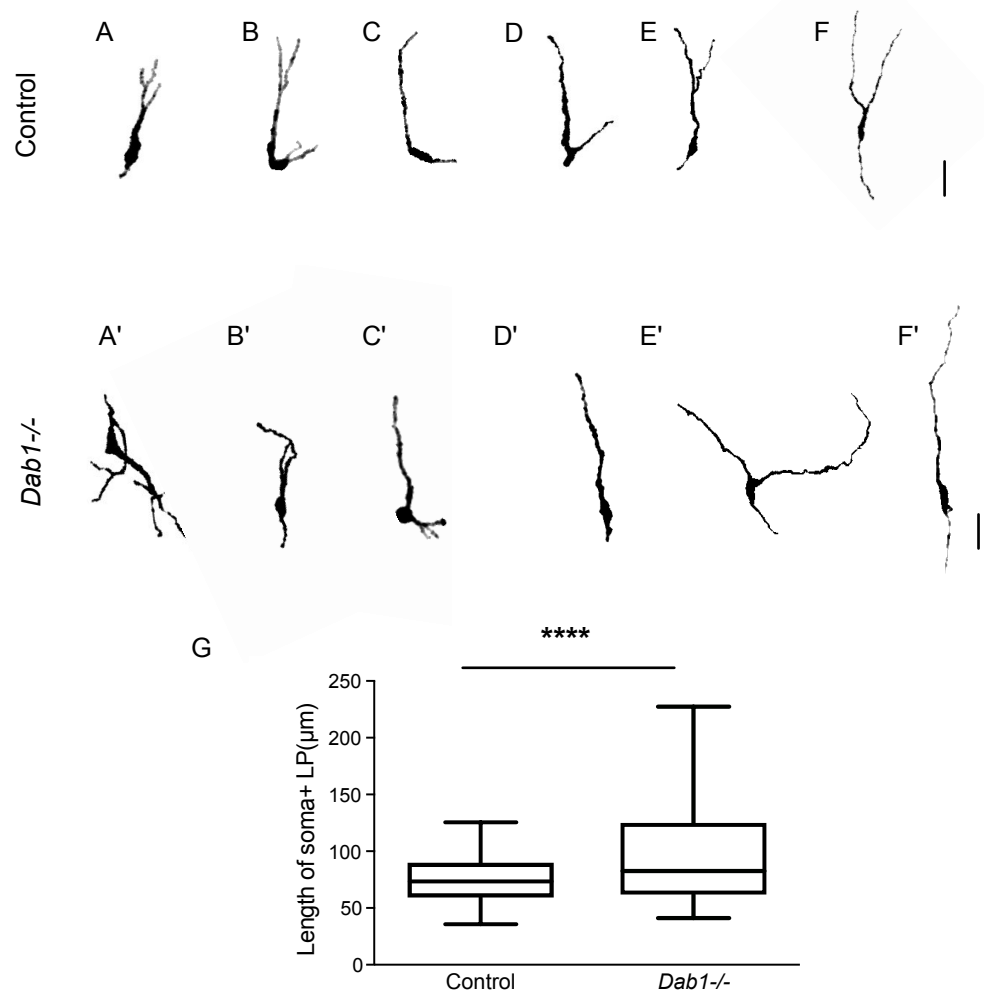

Figure 9 - Figure supplement 2. Greater spread in length of leading process in *Dab1*<sup>-/-</sup> mDA neurons. (A-F) 6 of 20 manually segmented control mDA neurons. (A'-F') 6 of 20 manually segmented *Dab1*<sup>-/-</sup> mDA neurons. (G) Length of cell soma and leading process shows a wider spread in the absence of Reelin signalling. \*\*\*\* p < 0.001 as assessed by Mann-Whitney's test.

765

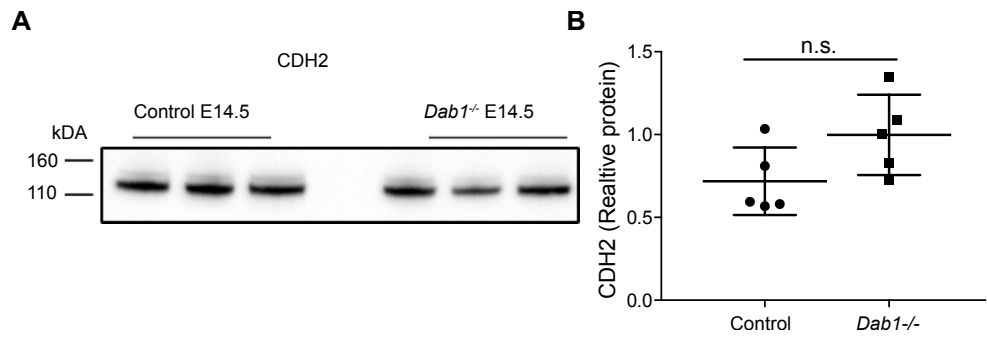

**Figure 10 - Figure supplement 1. CDH2 expression levels in the ventral midbrain of control and *Dab1*<sup>-/-</sup> brains at E14.5.** Immunoblot for ventral midbrain tissue from control and *Dab1*<sup>-/-</sup> brains (A) show no changes in relative protein levels of CDH2 in *Dab1*<sup>-/-</sup> tissue compared to controls (B). p-value 0.08 as assessed by Student's t-test (n= 5 brains/ genotype).

**Movie 1. Time lapse imaging with 2 photon excitation of *ex vivo* embryonic slices of the ventral midbrain.**

Time-lapse imaging of control (left) and *Dab1*<sup>-/-</sup> (right) organotypic slices with mosaic labelling of SN-mDA neurons reveal aberrant orientation and slower migration of *Dab1*<sup>-/-</sup> mDA neurons.

**Movie 2. SN-mDA neurons display dynamic cell morphology.**

3D projection of a transitional mDA neurons at t = 0 min (360° rotation) followed by MIP frames of the same neuron at subsequent time-points. Migratory spurts only occur in bipolar morphology while cell remains stationary or displays slow migration during multipolar phase.

**Movie 3. Morphology as detected by YFP mosaic labelling is similar to morphology detected by TH antibody.**

Example SN-mDA neuron from fixed, cleared whole-mount embryonic brain of the same age as used in time-lapse experiments (E14.5) shows similar morphology with YFP (green) and TH (magenta) immunostaining.

766

767 **References**

768 Alcántara S, Ruiz M, D'Arcangelo G, Ezan F, Lecea L, Curran T, et al. Regional and Cellular Patterns of reelin  
769 mRNA Expression in the Forebrain of the Developing and Adult Mouse. *Journal of Neuroscience*. 1998;  
770 18(19):7779–7799. <http://doi.org/10.1523/JNEUROSCI.18-19-07779.1998>.

- 771 **Arioka Y**, Shishido E, Kubo H, Kushima I, Yoshimi A, Kimura H. Single-cell trajectory analysis of human homoge-  
772 nous neurons carrying a rare RELN variant. *Translational Psychiatry*. 2018; p. 1–12.
- 773 **Berens P**. CircStat: A MATLAB Toolbox for Circular Statistics. *Journal of Statistical Software*. 2009; 31(10).  
774 <http://doi.org/10.18637/jss.v031.i10>.
- 775 **Bifsha P**, Balsalobre A, Drouin J. Specificity of Pitx3-Dependent Gene Regulatory Networks in Subsets of Midbrain  
776 Dopamine Neurons. . 2017; 54:4921–4935. <https://doi.org/10.1007/s12035-016-0040-y>.
- 777 **Björklund A**, Dunnett SB. Dopamine neuron systems in the brain: an update. *Trends in Neurosciences*. 2007;  
778 30(5):194–202. <http://doi.org/10.1016/j.tins.2007.03.006>.
- 779 **Blaess S**, Ang SL. Genetic control of midbrain dopaminergic neuron development. *Wiley Interdisciplinary*  
780 *Reviews: Developmental Biology*. 2015; 4(2):113–134. <http://doi.org/10.1002/wdev.169>.
- 781 **Blaess S**, Bodea GO, Kabanova A, Chanet S, Mugniery E, Derouiche A. Temporal-spatial changes in Sonic  
782 Hedgehog expression and signaling reveal different potentials of ventral mesencephalic progenitors to  
783 populate distinct ventral midbrain nuclei. *Neural Development*. 2011; 6(1):29. [http://doi.org/10.1186/1749-8104-](http://doi.org/10.1186/1749-8104-6-29)  
784 [6-29](http://doi.org/10.1186/1749-8104-6-29).
- 785 **Bodea GO**, Blaess S. Organotypic Slice Cultures of Embryonic Ventral Midbrain: A System to Study Dopaminergic  
786 Neuronal Development *in vitro*. *Journal of Visualized Experiments*. 2012; 59:1–7. [http://doi.org/10.](http://doi.org/10.3791/3350)  
787 [3791/3350](http://doi.org/10.3791/3350).
- 788 **Bodea GO**, Spille JH, Abe P, Andersson AS, Acker-Palmer A, Stumm R, et al. Reelin and CXCL12 regulate distinct  
789 migratory behaviors during the development of the dopaminergic system. *Development*. 2014; 141(3):661–  
790 673. <http://doi.org/10.1242/dev.099937>.
- 791 **Britto JM**, Tait KJ, Johnston LA, Hammond VE, Kalloniatis M, Tan SS. Altered speeds and trajectories of neu-  
792 rons migrating in the ventricular and subventricular zones of the reeler neocortex. *Cerebral Cortex*. 2011;  
793 21(5):1018–1027. <http://doi.org/10.1093/cercor/bhq168>.
- 794 **Britto JM**, Tait KJ, Lee EP, Gamble RS, Hattori M, Tan SS. Exogenous Reelin Modifies the Migratory Behavior of  
795 Neurons Depending on Cortical Location. *Cerebral Cortex*. 2013; 24(11):2835–2847. [http://doi.org/10.1093/cercor/](http://doi.org/10.1093/cercor/bht123)  
796 [bht123](http://doi.org/10.1093/cercor/bht123).
- 797 **Chai X**, Förster E, Zhao S, Bock HH, Frotscher M. Reelin stabilizes the actin cytoskeleton of neuronal processes  
798 by inducing n-cofilin phosphorylation at serine3. *Journal of Neuroscience*. 2009; 29(1):288–299. <https://doi.org/10.1523/JNEUROSCI.2934-08.2009>.
- 800 **Chai X**, Zhao S, Fan L, Zhang W, Lu X, Shao H, et al. Reelin and Cofilin Cooperate During the Migration of Cortical  
801 Neurons: a Quantitative Morphological Analysis. *Development*. 2016; 143:1029–1040. [doi:10.1242/dev.134163](https://doi.org/10.1242/dev.134163).
- 802 **Ekstrand MI**, Terzioglu M, Galter D, Zhu S, Hofstetter C, Lindqvist E, et al. Progressive parkinsonism in mice with  
803 respiratory-chain-deficient dopamine neurons. *Proceedings of the National Academy of Sciences of the U S A*.  
804 2007; 104(4):1325–1330. [10.1073/pnas.0605208103](https://doi.org/10.1073/pnas.0605208103); <http://doi.org/10.1073/pnas.0605208103>.
- 805 **Fishell G**, Kooy D. Pattern formation in the striatum: developmental changes in the distribution of striatonigral  
806 neurons. *Journal of Neuroscience*. 1987; 7(1969–1978):10–1523. [DOI:https://doi.org/10.1523/JNEUROSCI.07-07-](https://doi.org/10.1523/JNEUROSCI.07-07-01969.1987)  
807 [01969.1987](https://doi.org/10.1523/JNEUROSCI.07-07-01969.1987).
- 808 **Franco SJ**, Martinez-Garay I, Gil-Sanz C, Harkins-Perry SR, Müller U. Reelin Regulates Cadherin Function via  
809 Dab1/Rap1 to Control Neuronal Migration and Lamination in the Neocortex. *Neuron*. 2011; 69(3):482–497.  
810 <https://doi.org/10.1016/j.neuron.2011.01.003>; <http://doi.org/10.1016/j.neuron.2011.01.003>, via Dab1/Rap1 to.
- 811 **Frotscher M**, Zhao S, Wang S, Chai X. Reelin Signaling Inactivates Cofilin to Stabilize the Cytoskeleton of Migrating  
812 Cortical Neurons. *Frontiers in Cellular Neuroscience*. 2017; 11:805–7. <https://doi.org/10.3389/fncel.2017.00148>.
- 813 **Gärtner A**, Fornasiero EF, Munck S, Vennekens K, Seuntjens E, Huttner WB. N-cadherin specifies first asymmetry  
814 in developing neurons. *The EMBO Journal*. 2012; 31(8):1893–1903. <http://doi.org/10.1038/emboj.2012.41>.
- 815 **Gil-Sanz C**, Franco SJ, Martinez-Garay I, Espinosa A, Harkins-Perry S, Müller U. Cajal-Retzius Cells Instruct  
816 Neuronal Migration by Coincidence Signaling between Secreted and Contact-Dependent Guidance Cues.  
817 *Neuron*. 2013; 79(3):461–477. <http://doi.org/10.1016/j.neuron.2013.06.040>.
- 818 **Grace AA**, Bunney BS. Nigral dopamine neurons: intracellular recording and identification with L-dopa injection  
819 and histofluorescence. *Science*. 1980; 210(4470):654–656. <http://doi.org/10.1126/science.7433992>.

- 820 **Hack I**, Bancila M, Loulier K, Carroll P, Cremer H. Reelin is a detachment signal in tangential chain-migration  
821 during postnatal neurogenesis. *Nature Neuroscience*. 2002; 5(10):939–945. <http://doi.org/10.1038/nn923>.
- 822 **Harfe BD**, Scherz PJ, Nissim S, Tian H, McMahon AP, Tabin CJ. Evidence for an Expansion-Based Temporal Shh  
823 Gradient in Specifying Vertebrate Digit Identities. *Cell*. 2004; 118(4):517–528. [http://doi.org/10.1016/j.cell.2004.07.](http://doi.org/10.1016/j.cell.2004.07.024)  
824 [024](http://doi.org/10.1016/j.cell.2004.07.024).
- 825 **Hartfuss E**, Förster E, Bock HH, Hack MA, LePrince P, Luque JM. Reelin signaling directly affects radial glia  
826 morphology and biochemical maturation. *Development*. 2003; 130(19):4597–4609. [http://doi.org/10.1242/dev.](http://doi.org/10.1242/dev.00654)  
827 [00654](http://doi.org/10.1242/dev.00654).
- 828 **Hiesberger T**, Trommsdorff M, Howell BW, Goffinet A, Mumby MC, Cooper JA, et al. Direct binding of Reelin  
829 to VLDL receptor and ApoE receptor 2 induces tyrosine phosphorylation of disabled-1 and modulates tau  
830 phosphorylation. *Neuron*. 1999; 24(2):481–489. [https://doi.org/10.1016/S0896-6273\(00\)80861-2](https://doi.org/10.1016/S0896-6273(00)80861-2).
- 831 **Howell BW**, Hawkes R, Soriano P, Cooper JA. Neuronal position in the developing brain is regulated by mouse  
832 disabled-1. *Nature*. 1997; 389(6652):733–737. <http://doi.org/10.1038/39607>.
- 833 **Izumi Y**, Wakita S, Kanbara C, Nakai T, Akaike A, Kume T. Integrin  $\alpha 5\beta 1$  expression on dopaminergic neurons is  
834 involved in dopaminergic neurite outgrowth on striatal neurons. *Scientific Reports*. 2017; 7. [http://doi.org/10.](http://doi.org/10.1038/srep42111)  
835 [1038/srep42111](http://doi.org/10.1038/srep42111).
- 836 **Jaqaman K**, Loerke D, Mettlen M, Kuwata H, Grinstein S, Schmid SL, et al. Robust single-particle tracking in  
837 live-cell time-lapse sequences. *Nature Methods*. 2008; 5(8):695–702. <http://doi.org/10.1038/nmeth.1237>.
- 838 **Jossin Y**, Cooper JA. Reelin, Rap1 and N-cadherin orient the migration of multipolar neurons in the developing  
839 neocortex. *Nature Neuroscience*. 2011; 14(6):697–703. <http://doi.org/10.1038/nn.2816>.
- 840 **Jossin Y**, Goffinet AM. Reelin Signals through Phosphatidylinositol 3-Kinase and Akt To Control Cortical Develop-  
841 ment and through mTor To Regulate Dendritic Growth. *Molecular and Cellular Biology*. 2007; 27(20):7113–7124.  
842 <http://doi.org/10.1128/MCB.00928-07>.
- 843 **Kang WY**, Kim SS, Cho SK, Kim S, Suh-Kim H, Lee YD. Migratory Defect of Mesencephalic Dopaminergic Neurons  
844 in Developing Reeler mice. *Anatomy & Cell Biology*. 2010; 43(3):241–11. <https://doi.org/10.5115/acb.2010.43.3.241>.
- 845 **Keilani S**, Sugaya K. Reelin induces a radial glial phenotype in human neural progenitor cells by activation of  
846 Notch-1. *BMC Developmental Biology*. 2008; 8(1):69. <http://doi.org/10.1186/1471-213X-8-69>.
- 847 **Kriegstein AR**, Noctor SC. Patterns of neuronal migration in the embryonic cortex. *Trends in Neurosciences*.  
848 2004; 27(7):392–399. <http://doi.org/10.1016/j.tins.2004.05.001>.
- 849 **Krüger MT**, Zhao S, Chai X, Brunne B, Bouché E, Bock HH, et al. Role for Reelin-induced cofilin phosphorylation  
850 in the assembly of sympathetic preganglionic neurons in the murine intermediolateral column. *The European*  
851 *Journal of Neuroscience*. 2010; 32(10):1611–1617. <http://doi.org/10.1111/j.1460-9568.2010.07433.x>.
- 852 **Leemhuis J**, Bouché E, Frotscher M, Henle F, Hein L, Herz J. Reelin signals through apolipoprotein E receptor  
853 2 and Cdc42 to increase growth cone motility and filopodia formation. *Journal of Neuroscience*. 2010;  
854 30(44):14759–14772. <http://doi.org/10.1523/JNEUROSCI.4036-10.2010>.
- 855 **Li J**, Duarte T, Kocabas A, Works M, McConnell SK, Hynes MA. Evidence for topographic guidance of dopaminergic  
856 axons by differential Netrin-1 expression in the striatum. *Molecular and Cellular Neuroscience*. 2014; 61:85–96.  
857 <https://doi.org/10.1016/j.mcn.2014.05.003>.
- 858 **Longair MH**, Baker DA, Armstrong JD. Simple Neurite Tracer: Open Source software for reconstruction,  
859 visualization and analysis of neuronal processes. *Bioinformatics*. 2011; .
- 860 **Maciver SK**, Hussey PJ. The ADF/cofilin family: actin-remodeling proteins. *Genome Biology*. 2002; 3(5):3007–1.  
861 <http://doi.org/10.1186/gb-2002-3-5-reviews3007>.
- 862 **Manno GL**, Gyllborg D, Codeluppi S, Nishimura K, Saltó C, Zeisel A. Molecular Diversity of Midbrain Development  
863 in Mouse, Human, and Stem Cells. *Cell*. 2016; 167(2):566–580. <http://doi.org/10.1016/j.cell.2016.09.027>.
- 864 **Martini FJ**, Valiente M, Bendito GL, Szabo G, Moya F, Valdeolmillos M, et al. Biased Selection of Leading Process  
865 Branches Mediates Chemotaxis During Tangential Neuronal Migration. *Development*. 2008; 136(1):41–50.
- 866 **Morales M**, Margolis EB. Ventral tegmental area: cellular heterogeneity, connectivity and behaviour. *Nature*  
867 *Reviews Neuroscience*. 2017; 18(2):73–85. <http://doi.org/10.1038/nrn.2016.165>.

- 868 **Nishikawa S**, Goto S, Yamada K, Hamasaki T, Ushio Y. Lack of Reelin causes malpositioning of nigral dopamin-  
869 ergic neurons: Evidence from comparison of normal and Reelin mutant mice. *The Journal of Comparative*  
870 *Neurology*. 2003; 461(2):166–173. <http://doi.org/10.1002/cne.10610>.
- 871 **Panman L**, Papathanou M, Laguna A, Oosterveen T, Volakakis N, Acampora D. Sox6 and Otx2 Control the  
872 Specification of Substantia Nigra and Ventral Tegmental Area Dopamine Neurons. *CellReports*. 2014; 8(4):1018-  
873 1025. <http://doi.org/10.1016/j.celrep.2014.07.016>.
- 874 **Park TJ**, Curran T. Crk and Crk-Like Play Essential Overlapping Roles Downstream of Disabled-1 in the Reelin  
875 Pathway. *Journal of Neuroscience*. 2008; 28(50):13551–13562. <http://doi.org/10.1523/JNEUROSCI.4323-08.2008>.
- 876 **Petrie RJ**, Doyle AD, Yamada KM. Random versus directionally persistent cell migration. *Nature Reviews*  
877 *Molecular Cell Biology*. 2009; 10(8):538–549. <http://doi.org/10.1038/nrm2729>.
- 878 **Phelps P**. Evidence for a Cell-Specific Action of Reelin in the Spinal Cord. *Developmental Biology*. 2002;  
879 244(1):180–98.
- 880 **Poulin JF**, Zou J, Drouin-Ouellet J, Kim KYA, Cicchetti F, Awatramani RB. Defining Midbrain Dopaminergic Neuron  
881 Diversity by Single-Cell Gene Expression Profiling. *Cell Reports*. 2014; 9(3):930–943. <http://doi.org/10.1016/j.celrep.2014.10.008>.
- 882
- 883 **Prakash N**, Puelles E, Freude K, Trümbach D, Omodei D, Salvio MD. Nkx6-1 controls the identity and fate  
884 of red nucleus and oculomotor neurons in the mouse midbrain. *Development*. 2009; 136(15):2545–2555.  
885 <http://doi.org/10.1242/dev.031781>.
- 886 **Przedborski S**. The two-century journey of Parkinson disease research. *Nature Reviews Neuroscience*. 2017;  
887 18(4):251–259. <http://doi.org/10.1038/nrn.2017.25>.
- 888 **Salvio MD**, Giovannantonio LGD, Omodei D, Acampora D, Simeone A. Otx2 expression is restricted to dopamin-  
889 ergic neurons of the ventral tegmental area in the adult brain. *The International Journal of Developmental*  
890 *Biology*. 2010; 54(5):939–945. <http://doi.org/10.1387/ijdb.092974ms>.
- 891 **Schwarz MK**, Scherbarth A, Sprengel R, Engelhardt J, Theer P, Giese G. Fluorescent-Protein Stabilization  
892 and High-Resolution Imaging of Cleared, Intact Mouse Brains. *PLoS ONE*. 2015; 10(5):0124650–26. <http://doi.org/10.1371/journal.pone.0124650>.
- 893
- 894 **Sekine K**, Kawauchi T, Kubo KI, Honda T, Herz J, Hattori M. Reelin Controls Neuronal Positioning by Promoting  
895 Cell-Matrix. *Neuron*. 2012; 76(2):353–369. <http://doi.org/10.1016/j.neuron.2012.07.020>.
- 896 **Sekine K**, Kubo KI, Nakajima K. How does Reelin control neuronal migration and layer formation in the  
897 developing mammalian neocortex? *Neuroscience Research*. 2014; 86:50–58. <http://doi.org/10.1016/j.neures.2014.06.004>.
- 898
- 899 **Sharaf A**, Bock HH, Spittau B, Bouché E, Kriegstein K. ApoER2 and VLDLr Are Required for Mediating Reelin  
900 Signalling Pathway for Normal Migration and Positioning of Mesencephalic Dopaminergic Neurons. *PLoS*  
901 *ONE*. 2013; 8(8):71091–11. <http://doi.org/10.1371/journal.pone.0071091>.
- 902 **Sharaf A**, Rahhal B, Spittau B, Roussa E. Localization of Reelin Signaling Pathway Components in Murine Midbrain  
903 and Striatum. *Cell and Tissue Research*. 2015; 359(2):393–407. <https://doi.org/10.1007/s00441-014-2022-6>.
- 904 **Simó S**, Jossin Y, Cooper JA. Cullin 5 regulates cortical layering by modulating the speed and duration of  
905 Dab1-dependent neuronal migration. *Journal of Neuroscience*. 2010; 30(16):5668–5676. <http://doi.org/10.1523/JNEUROSCI.0035-10.2010>.
- 906
- 907 **Srinivas S**, Watanabe T, Lin CS, William CM, Tanabe Y, Jessell TM, et al. Cre reporter strains produced by  
908 targeted insertion of EYFP and ECFP into the ROSA26 locus. *BMC Developmental Biology*. 2001; 1(1):4.  
909 <http://doi.org/10.1186/1471-213X-1-4>.
- 910 **Tinevez JY**, Perry N, Schindelin J, Hoopes GM, Reynolds GD, Laplantine E. TrackMate: An open and extensible  
911 platform for single-particle tracking. *Methods*. 2017; 115:80–90. <http://doi.org/10.1016/j.ymeth.2016.09.016>.
- 912 **Trommsdorff M**, Gotthardt M, Hiesberger T, Shelton J, Stockinger W, Nimpf J, et al. Reeler/Disabled-like  
913 disruption of neuronal migration in knockout mice lacking the VLDL receptor and ApoE receptor 2. *Cell*. 1999;  
914 97(6):689–701. [https://doi.org/10.1016/S0092-8674\(00\)80782-5](https://doi.org/10.1016/S0092-8674(00)80782-5).
- 915 **Vaswani AR**, Blaess S. Reelin Signaling in the Migration of Ventral Brain Stem and Spinal Cord Neurons. *Frontiers*  
916 *Cellular Neuroscience*. 2016; 10:579–14. <http://doi.org/10.3389/fncel.2016.00062>.

- 917 **Volkow ND**, Morales M. The Brain on Drugs: From Reward to Addiction. *Cell*. 2015; 162(4):712–725. <http://doi.org/10.1016/j.cell.2015.07.046>.  
918
- 919 **Voss AK**, Britto JM, Dixon MP, Sheikh BN, Collin C, Tan SS, et al. C3G regulates cortical neuron migration, preplate  
920 splitting and radial glial cell attachment. *Development*. 2008; 135(12):2139–2149. [http://doi.org/10.1242/dev.](http://doi.org/10.1242/dev.016725)  
921 [016725](http://doi.org/10.1242/dev.016725).
- 922 **Wang S**, Brunne B, Zhao S, Chai X, Li J, Lau J. Trajectory Analysis Unveils Reelin's Role in the Directed Migration  
923 of Granule Cells in the Dentate Gyrus. *Journal of Neuroscience*. 2018; 38(1):137–148. [https://doi.org/10.1523/](https://doi.org/10.1523/JNEUROSCI.0988-17.2017)  
924 [JNEUROSCI.0988-17.2017](https://doi.org/10.1523/JNEUROSCI.0988-17.2017).
- 925 **Weisenhorn DMV**, Giesert F, Wurst W. Diversity Matters–Heterogeneity of Dopaminergic Neurons in the  
926 Ventral Mesencephalon and Its Relation to Parkinson's Disease. *Journal of Neurochemistry*. 2016; 139(S1):8–  
927 26. <http://doi:10.1111/jnc.13670>.
- 928 **Wu PH**, Giri A, Wirtz D. Statistical analysis of cell migration in 3D using the anisotropic persistent random walk  
929 model. *Nature Protocols*. 2015; 10(3):517–527. <http://doi.org/10.1038/nprot.2015.030>.
- 930 **Xu B**, Goldman JS, Rymar VV, Forget C, Lo PS, Bull SJ. Critical Roles for the Netrin Receptor Deleted in Colorectal  
931 Cancer in Dopaminergic Neuronal Precursor Migration, Axon Guidance, and Axon Arborization. *Neuroscience*.  
932 2010; 169(2):932–949. <http://doi.org/10.1016/j.neuroscience.2010.05.025>.
- 933 **Yabut O**, Renfro A, Niu S, Swann JW, Marín O, D'Arcangelo G. Abnormal laminar position and dendrite develop-  
934 ment of interneurons in the reeler forebrain. *Brain Research*. 2007; 1140:75–83. [http://doi.org/10.1016/j.brainres.](http://doi.org/10.1016/j.brainres.2005.09.070)  
935 [2005.09.070](http://doi.org/10.1016/j.brainres.2005.09.070).
- 936 **Zhang JH**, Zhao YF, He XX, Zhao Y, He ZX, Zhang L. Dab1 Phosphorylation Participates in the Multipolar-to-Bipolar  
937 Transition of Migrating Neurons. *CellReports*. 2018; 22(13):3598–3611. <http://doi.org/10.1016/j.celrep.2018.03.005>.
